# Supplementary material
Source: PubMed Central journal article supplement (PMC4509571)
Supplement: NIHMS105973-supplement-2_si_002.pdf [file NIHMS105973-supplement-2_si_002.pdf]

# Synthesis and Structural Characterization of Sialic Acid-Glutamic Acid Hybrid Foldamers as Conformational Surrogates of $\alpha$ -2,8-Linked Polysialic Acid

**Jonel P. Saludes, James B. Ames and Jacquelyn Gervay-Hague\***

*Department of Chemistry, University of California, One Shields Ave., Davis, CA 95616*

## Supporting Information

- S4** Scheme S1: Synthetic scheme for **1**
- S4** Scheme S2: Synthetic scheme for **4**
- S5** Scheme S3: Representative microwave-assisted solid phase peptide synthesis
- S6-S12** Characterization of compounds **5-11**
- S13-S14** Figure S1: Mass spectra of compounds **5-12**
- S15** Figure S2:  $^1\text{H}$  NMR spectrum of compound **5**
- S16** Figure S3:  $^1\text{H}$  NMR spectrum of compound **6**
- S17** Figure S4:  $^1\text{H}$  NMR spectrum of compound **7**
- S18** Figure S5:  $^1\text{H}$  NMR spectrum of compound **8**
- S19** Figure S6:  $^1\text{H}$  NMR spectrum of compound **9**
- S20** Figure S7:  $^1\text{H}$  NMR spectrum of compound **10**
- S21** Figure S8:  $^1\text{H}$  NMR spectrum of compound **11**
- S22** Figure S9:  $^1\text{H}$  NMR spectrum of compound **12**
- S23** Figure S10:  $^{13}\text{C}$  NMR spectrum of compound **5**
- S24** Figure S11:  $^{13}\text{C}$  NMR spectrum of compound **6**
- S25** Figure S12:  $^{13}\text{C}$  NMR spectrum of compound **7**
- S26** Figure S13:  $^{13}\text{C}$  NMR spectrum of compound **8**
- S27** Figure S14:  $^{13}\text{C}$  NMR spectrum of compound **9**

- S28** Figure S15:  $^{13}\text{C}$  NMR spectrum of compound **10**
- S29** Figure S16:  $^{13}\text{C}$  NMR spectrum of compound **11**
- S30** Figure S17:  $^{13}\text{C}$  NMR spectrum of compound **12**
- S31** Figure S18: Stack plot of the amide regions from the  $^1\text{H}$  NMR DMSO- $d_6$  at 298 K, 600 MHz of **6**, **8**, **10**, and **12**
- S32** Figure S19: NH/ND exchange study for **6**, **8**, **10**, and **12** in DMSO- $d_6$  at 298 K, 600 MHz.
- S33** Figure S20: Sample IR spectra and plots of amide/azide peak area integration used to monitor SPPS
- S34** Assignment strategy for the NMR chemical shifts of **11** and **12**.
- S37** Figure S21: Prominent long range ROE's for **12**
- S38** Figure S22. The effect of solvent and solvent screening of electrostatic charges in the X-PLOR structure calculation
- S39** Table 1: ROEs observed in the 500 ms ROESY spectrum of **10** in 9:1  $\text{H}_2\text{O}/\text{D}_2\text{O}$  at 600 MHz, 298 K.
- S40** Table 2: ROEs observed in the 500 ms ROESY spectrum of **12** in 9:1  $\text{H}_2\text{O}/\text{D}_2\text{O}$  at 600 MHz, 298 K.
- S41** Figure S23: Overlay of 25 low energy structures of **8** showing non-convergence to a single-preferred structure
- S42** Figure S24: UV spectrum of **6** in  $\text{D}_2\text{O}$ .
- S42** Figure S23: UV spectrum of **8** in  $\text{D}_2\text{O}$ .
- S43** Figure S26: UV spectrum of **10** in  $\text{D}_2\text{O}$ .
- S44** Figure S27: UV spectrum of **12** in  $\text{D}_2\text{O}$ .

**General Experimental Section.** NMR spectra were recorded on 400 and 600 MHz NMR spectrometers. Chemical shifts were referenced to residual  $\text{CHCl}_3$  ( $\delta_{\text{H}} = 7.26$ ),  $\text{CHD}_2\text{OD}$  ( $\delta_{\text{H}} = 3.30$ ),  $(\text{CHD}_2)_2\text{CO}$  ( $\delta_{\text{H}} = 2.05$ ),  $\text{CDCl}_3$  ( $\delta_{\text{C}} = 77.1$ ),  $\text{CD}_3\text{OD}$ , ( $\delta_{\text{C}} = 49.0$ ) or  $(\text{CD}_3)_2\text{CO}$  ( $\delta_{\text{C}} = 39.0$ ). Solutions in  $\text{D}_2\text{O}$  were referenced to dioxane calibrated to TSP. Low-resolution mass spectra were obtained using a QTRAP mass spectrometer. High Resolution mass spectra were recorded at the UC Davis Molecular Structure Facility using MALDI-TOF with internal calibration. Infrared spectra were recorded on an ATR-FTIR spectrometer. Microwave-assisted SPPS was done using a commercial microwave reactor. Rink amide resin, *N*-acetylneuraminic acid, and Fmoc-Glu(OBt)-OH, and *N*-acetylneuraminic acid were obtained from commercial sources. Reagents were used as received unless otherwise indicated. Solution phase reactions were monitored by TLC using Si gel 60 F254 or RP- $\text{C}_{18}$  glass-backed plate.

### Amino acids used for constructing the $\alpha/\delta$ hybrid peptides

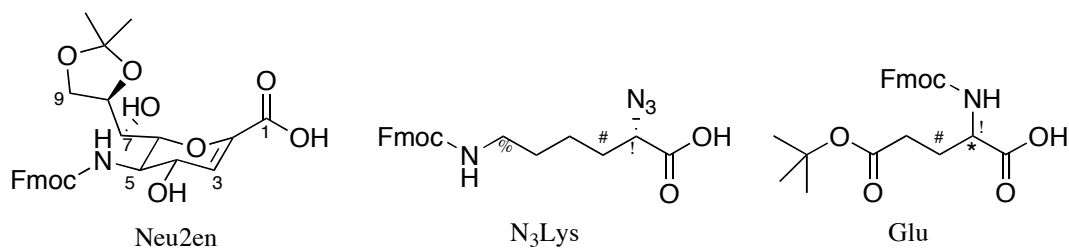

### Synthesis of Sialic Acid Derivative Fmoc-Neu2en (**1**)

*N*-(9-fluorenylmethoxycarbonyl)-2,3-dehydro-8,9-isopropylidene neuraminic acid **1** (Fmoc-Neu2en) was synthesized following our previous method<sup>1</sup> with slight modification to furnish an overall yield of 32% in eight steps Scheme 1.

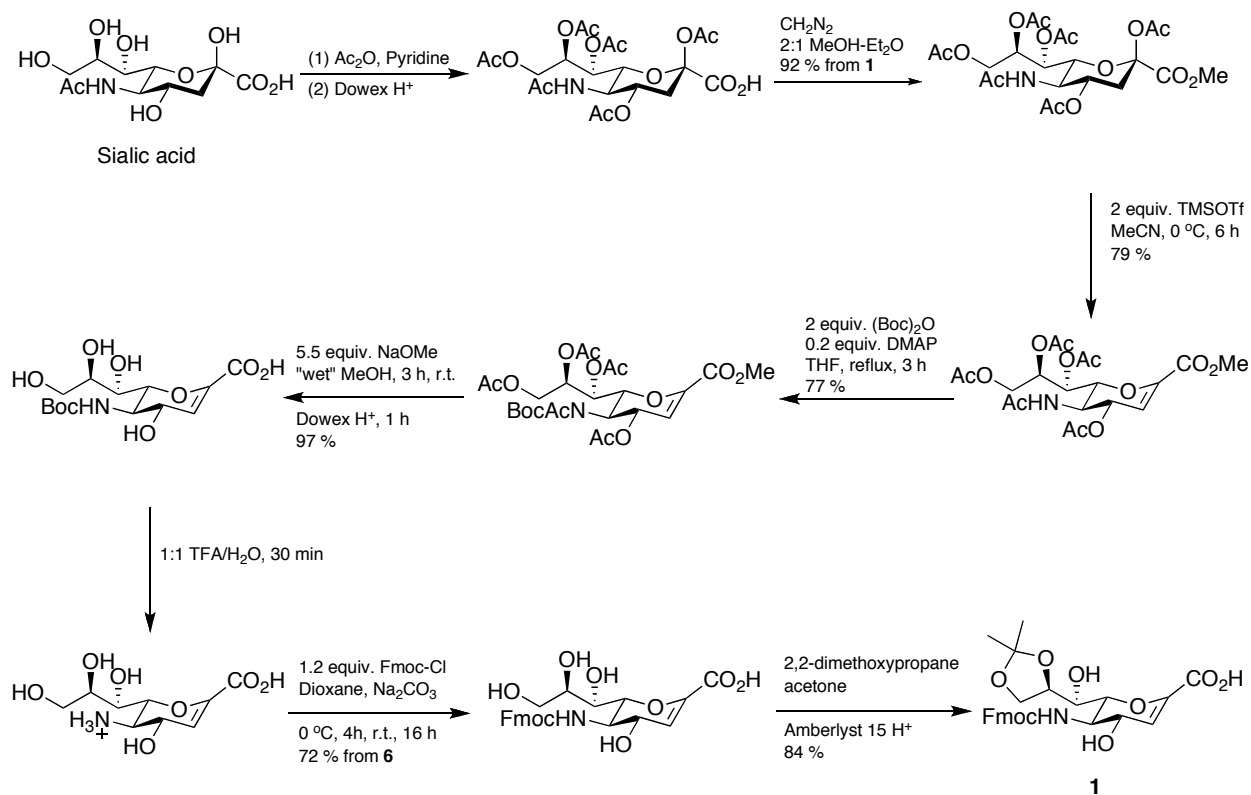

**Scheme S1.** Synthetic scheme for **1**.

### Synthesis of Azidolysine Linker (**4**)

Compound **4** (N<sub>3</sub>Lys) was prepared following the method developed by Wong,<sup>2</sup> and adopted by others.<sup>3</sup> The crude product was concentrated to dryness, and chromatographed through a column of silica gel using 85:15 CH<sub>2</sub>Cl<sub>2</sub>-MeOH to yield **4** (2.07 g, 92%) as shown in Scheme 2.

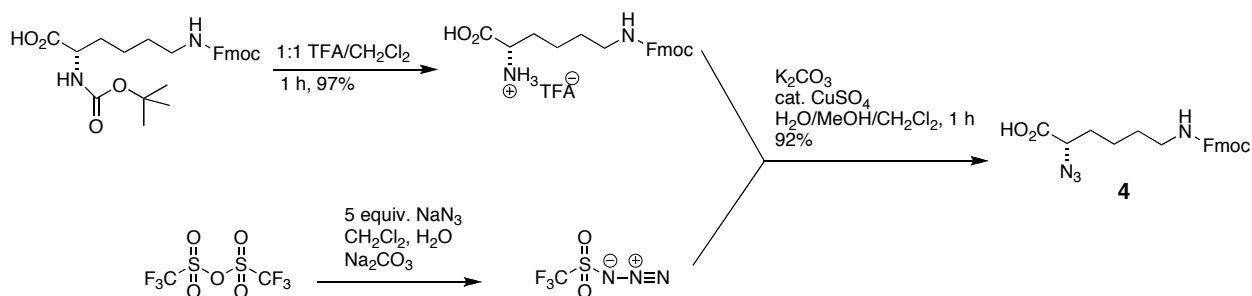

**Scheme S2.** Synthetic scheme for **4**.

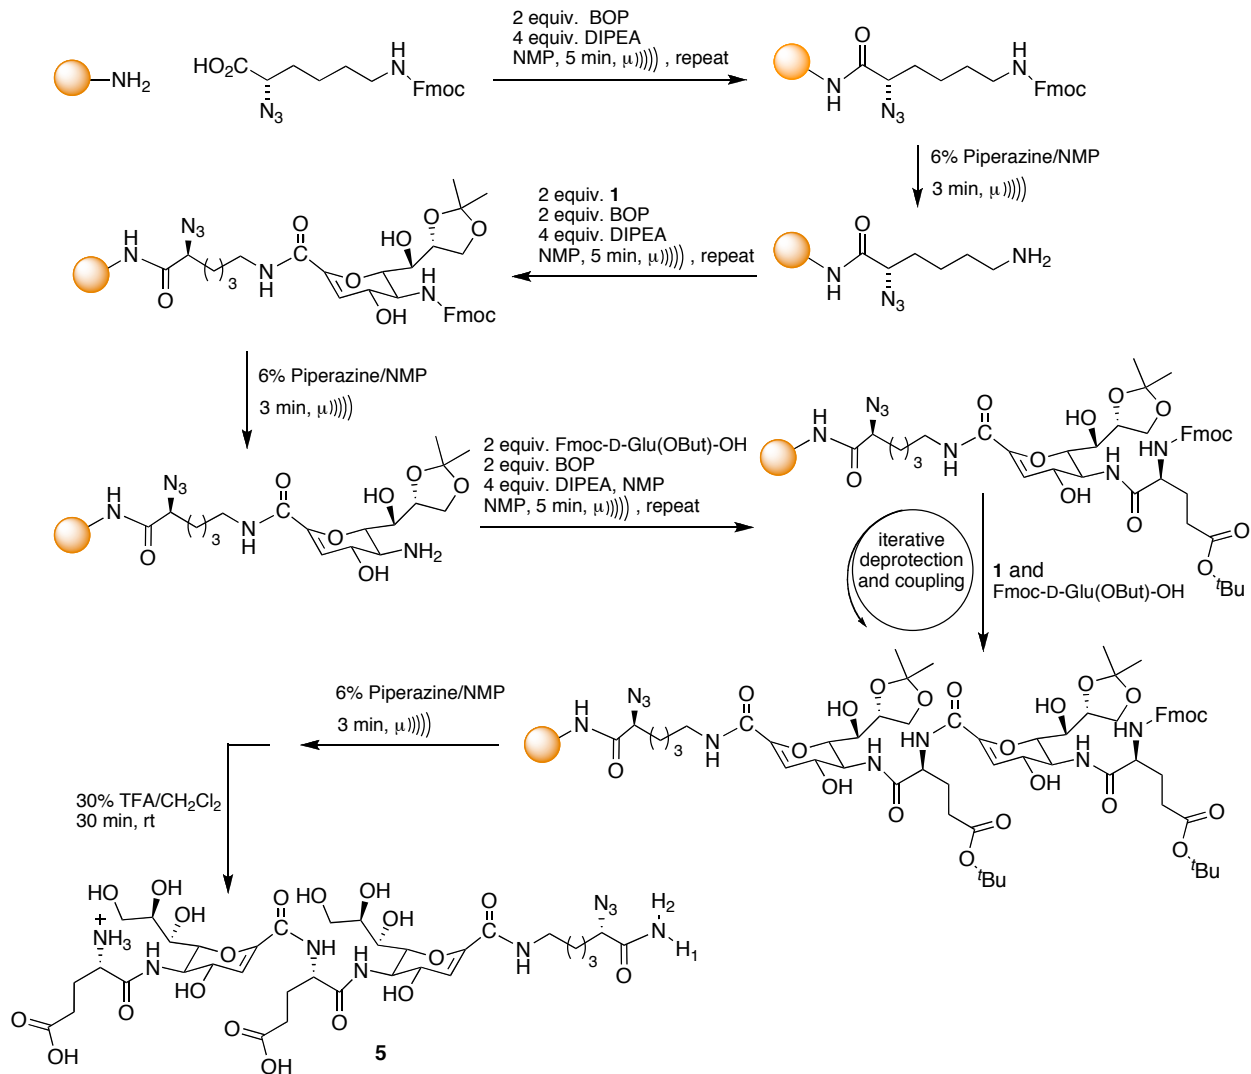

**Scheme S3.** Representative microwave-assisted solid phase peptide synthesis.

Assignments of H for each oligomer are based upon the following system: **HX-Y**, which refers to **H** in position **X** at residue number **Y** counting from the *N*-terminus.

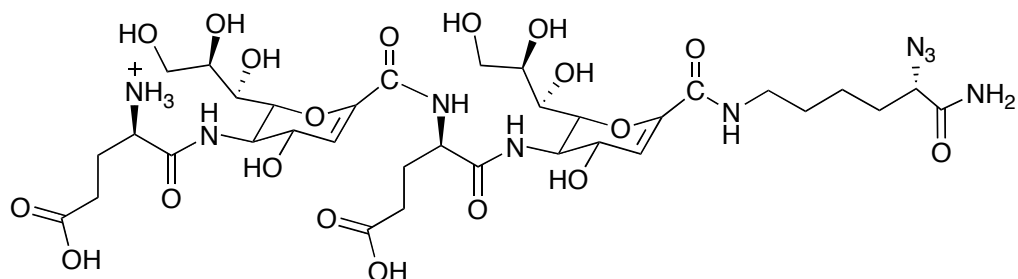

**Neu2en/D-Glu-4 (5)**: obtained in 27% purified yield.  $^1\text{H}$  NMR ( $\text{D}_2\text{O}$ , 600 MHz): d 5.91 (d, 1H,  $J = 3.0$  Hz, H3-2), 5.82 (d, 1H,  $J = 3.0$  Hz, H3-4), 4.57 (dd, 1H,  $J = 7.2, 2.4$  Hz, H4-2), 4.55 (dd, 1H,  $J = 7.2, 2.4$  Hz, H3-4), 4.54 (dd, 1H,  $J = 7.2, 4.8$  Hz, H $\alpha$ -3), 4.48 (dd, 1H,  $J = 10.8, 0.6$  Hz, H6-2), 4.39 (dd, 1H,  $J = 10.8, 0.6$  Hz, H6-4), 4.24 (dd, 1H,  $J = 10.8, 9.0$  Hz, H5-2), 4.16 (dd, 1H,  $J = 10.8, 8.4$  Hz, H5-2), 4.15 (dd, 1H,  $J = 4.8, 2.4$  Hz, H $\alpha$ -5), 4.14 (dd, 1H,  $J = 4.8, 2.4$  Hz, H $\alpha$ -2), 4.00 (ddd, 1H,  $J = 9.6, 5.4, 2.4$  Hz, H8-2), 3.92-3.88 (m, 3H, H8-4, H9/9'-2), 3.71 (dd, 1H,  $J = 6.0, 6.0$  Hz, H9'-4), 3.69 (dd, 1H,  $J = 3.0, 3.0$  Hz, H7-2), 3.67 (dd, 1H,  $J = 6.0, 6.0$  Hz, H9-4), 3.62 (d, 1H,  $J = 9.0$  Hz, H7-4), 3.37-3.28 (m, 2H, H $\epsilon$ -5), 2.62-2.49 (m, 4H, H $\gamma$ -1/3), 2.28-2.09 (m, 4H, H $\beta$ -1/3), 1.90-1.78 (m, 2H, H $\beta$ -5), 1.66-1.58 (m, 2H, H $\delta$ -5), 1.44 (p, 2H,  $J = 7.8$  Hz, H $\gamma$ -5).  $^{13}\text{C}$  NMR ( $\text{D}_2\text{O}$ , 150 MHz): d 180.2, 179.3, 178.3, 176.2, 172.8, 166.4, 148.7, 148.0, 111.7, 110.9, 78.8, 72.7, 70.7, 70.2, 69.8, 65.8, 65.7, 56.5, 55.9, 55.8, 52.8, 42.0, 33.6, 33.1, 32.6, 30.6, 29.1, 24.8. MALDI-TOFMS:  $[\text{M} + \text{Na}^+]$  calcd for  $\text{C}_{34}\text{H}_{53}\text{N}_9\text{O}_{19}\text{Na}^+$ , 914.3350; found, 914.3400.

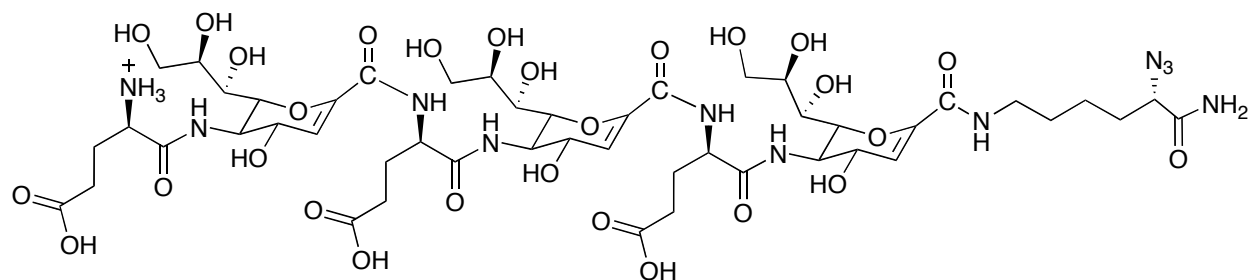

**Neu2en/D-Glu-6 (6):** obtained in 39% purified yield.  $^1\text{H}$  NMR ( $\text{D}_2\text{O}$ , 600 MHz): d 5.91 (d, 1H,  $J = 2.4$  Hz, H3-2), 5.89 (d, 1H,  $J = 2.4$  Hz, H3-4), 5.82 (d, 1H,  $J = 1.8$  Hz, H3-6), 4.57-4.51 (m, 5H, H4-6, H $\alpha$ -5, H4-4, H $\alpha$ -3, H4-2), 4.48 (dd, 1H,  $J = 10.8, 1.2$  Hz, H6-2), 4.43 (dd, 1H,  $J = 10.8, 1.2$  Hz, H6-4), 4.38 (dd, 1H,  $J = 10.8, 1.2$  Hz, H6-6), 4.24 (dd, 1H,  $J = 10.8, 9.0$  Hz, H5-2), 4.20-4.18 (m, 1H, H5-4), 4.15 (dd, 1H,  $J = 9.0, 1.8$  Hz, H5-6), 4.14 (t, 1H,  $J = 5.4$  Hz, H $\alpha$ -7), 4.14-4.12 (m, 1H, H $\alpha$ -1), 4.01-3.96 (m, 3H, H8-2/4), 3.91-3.85 (m, 5H, H8-6, H9-2/4), 3.72-3.61 (m, 5H, H7-6, H9-6, H7-4, H7-2), 3.37-3.28 (m, 2H, H $\epsilon$ -7), 2.58-2.47 (m, 6H, H $\gamma$ -1/3/5), 2.27-2.09 (m, 6H, H $\beta$ -1/3/5), 1.88-1.78 (m, 2H, H $\beta$ -7), 1.61 (p, 2H,  $J = 6.6$  Hz, H $\delta$ -7), 1.44 (p, 2H,  $J = 7.8$  Hz, H $\gamma$ -7).  $^{13}\text{C}$  NMR ( $\text{D}_2\text{O}$ , 150 MHz): d 180.7, 180.4, 179.9, 178.4, 176.5, 172.7, 166.6, 166.0, 148.6, 148.0, 111.9, 111.7, 110.9, 79.0, 78.9, 72.9, 72.8, 70.8, 70.7, 69.7, 69.6, 65.9, 65.8, 65.7, 56.6, 55.8, 52.9, 52.8, 41.9, 33.8, 33.4, 33.0, 30.7, 29.4, 29.3, 24.8. MALDI-TOFMS:  $[\text{M} + \text{Na}^+]$  calcd for  $\text{C}_{48}\text{H}_{73}\text{N}_{11}\text{O}_{28}\text{Na}^+$ , 1274.4518; found, 1274.452.

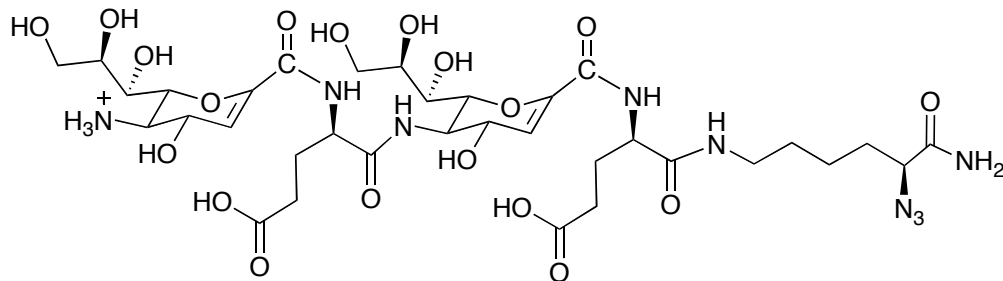

**D-Glu/Neu2en-4 (7):** obtained in 39% purified yield.  $^1\text{H}$  NMR ( $\text{D}_2\text{O}$ , 600 MHz): d 5.97 (d, 1H,  $J = 2.4$  Hz, H3-1), 5.90 (d, 1H,  $J = 2.4$  Hz, H3-3), 4.66 (dd, 1H,  $J = 8.4, 3.0$  Hz, H4-1), 4.65 (dd, 1H,  $J = 10.2, 1.8$  Hz, H6-1), 4.58 (dd, 2H,  $J = 9.0, 2.4$  Hz, H4-3, H $\alpha$ -2), 4.45 (dd, 1H,  $J = 10.8, 0.6$  Hz, H6-3), 4.43 (dd, 1H,  $J = 9.0, 5.4$  Hz, H $\alpha$ -4), 4.20 (dd, 1H,  $J = 10.8, 9.0$  Hz, H5-3), 4.15 (dd, 1H,  $J = 7.2, 5.4$  Hz, H $\alpha$ -5), 4.08 (ddd, 1H,  $J = 9.0, 5.4, 2.4$  Hz, H8-1), 4.00 (ddd, 1H,  $J = 9.6, 6.0, 2.4$  Hz, H8-3), 3.94 (dd, 1H,  $J = 12.0, 2.4$  Hz, H9'-1), 3.92 (dd, 1H,  $J = 10.8, 2.4$  Hz, H7-1), 3.91 (dd, 1H,  $J = 9.0, 1.8$  Hz, H9-3), 3.71 (dd, 1H,  $J = 12.0, 6.0$  Hz, H9'-3), 3.66 (dd, 1H,  $J = 9.6, 1.2$  Hz, H7-3), 3.65 (dd, 1H,  $J = 10.2, 8.4$  Hz, H5-1), 3.31-3.22 (m, 2H, H $\epsilon$ -5), 2.60-2.48 (m, 4H, H $\gamma$ -2/4), 2.30-2.06 (m, 4H, H $\beta$ -2/4), 1.91-1.77 (m, 2H, H $\beta$ -5), 1.64-1.52 (m, 2H, H $\delta$ -5), 1.44 (p, 2H,  $J = 7.2$  Hz, H $\gamma$ -5).  $^{13}\text{C}$  NMR ( $\text{D}_2\text{O}$ , 150 MHz): d 180.3, 180.2, 178.4, 176.3, 175.7, 166.4, 166.0, 145.0, 111.8, 111.0, 79.0, 77.9, 72.9, 72.8, 70.8, 70.6, 69.7, 67.6, 66.0, 65.8, 65.5, 56.6, 56.4, 53.7, 52.9, 41.8, 33.8, 33.1, 30.8, 29.2, 24.8. MALDI-TOFMS:  $[\text{M} + \text{Na}^+]$  calcd for  $\text{C}_{34}\text{H}_{53}\text{N}_9\text{O}_{19}\text{Na}^+$ , 914.3350; found, 914.3410.



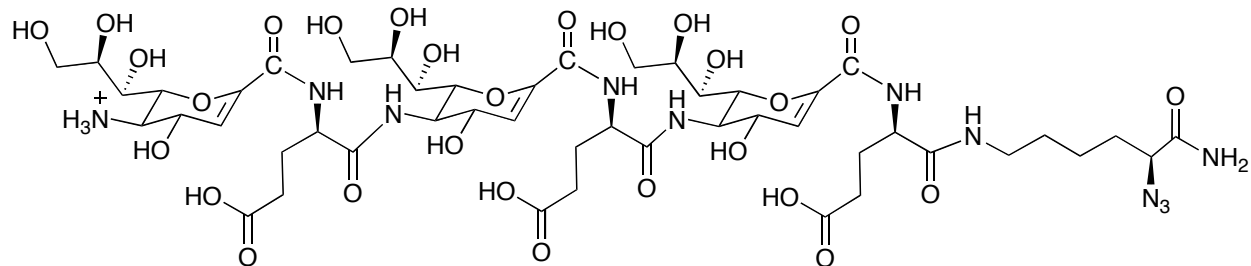

**D-Glu/Neu2en-6 (8):** obtained in 24% purified yield.  $^1\text{H}$  NMR ( $\text{D}_2\text{O}$ , 600 MHz):  $\delta$  5.98 (d, 1H,  $J$  = 2.4 Hz, H3-1), 5.92 (d, 1H,  $J$  = 2.4 Hz, H3-3), 5.90 (d, 1H,  $J$  = 2.4 Hz, H3-5), 4.67 (dd, 1H,  $J$  = 6.6, 2.4 Hz, H4-1), 4.66 (dd, 1H,  $J$  = 7.8, 2.4 Hz, H6-1), 4.59 (dd, 2H,  $J$  = 9.0, 2.4 Hz, H4-3/5), 4.58 (dd, 1H,  $J$  = 9.0, 4.8 Hz, H $\alpha$ -2), 4.56 (dd, 1H,  $J$  = 8.4, 4.2 Hz, H $\alpha$ -4), 4.47 (dd, 1H,  $J$  = 7.2, 1.2 Hz, H6-3), 4.45 (dd, 1H,  $J$  = 7.2, 1.2 Hz, H6-5), 4.42 (dd, 1H,  $J$  = 9.0, 5.4 Hz, H $\alpha$ -6), 4.22 (dd, 1H,  $J$  = 9.0, 4.8 Hz, H5-3), 4.20 (dd, 1H,  $J$  = 8.4, 4.2 Hz, H5-5), 4.16 (dd, 1H,  $J$  = 7.8, 5.4 Hz, H $\alpha$ -7), 4.07 (ddd, 1H,  $J$  = 9.0, 5.4, 3.0 Hz, H8-1), 4.03-3.99 (m, 2H, H8-3/5), 3.95 (dd, 1H,  $J$  = 12.0, 3.0 Hz, H9'-1), 3.93 (dd, 2H,  $J$  = 11.4, 2.4 Hz, H9'-3/5), 3.92 (dd, 1H,  $J$  = 8.4, 1.8 Hz, H7-1), 3.80 (dd, 1H,  $J$  = 12.6, 6.0 Hz, H9-1), 3.73 (dd, 1H,  $J$  = 6.6, 1.8 Hz, H9-3), 3.71 (dd, 1H,  $J$  = 7.8, 1.8 Hz, H9-5), 3.67 (dd, 1H,  $J$  = 9.0, 1.2 Hz, H7-3), 3.66 (dd, 1H,  $J$  = 9.0, 1.2 Hz, H5-5), 3.32-3.22 (m, 2H, H $\epsilon$ -7), 2.60-2.49 (m, 6H, H $\gamma$ -2/4/6), 2.31-2.07 (m, 6H, H $\beta$ -2/4/6), 1.91-1.78 (m, 2H, H $\beta$ -7), 1.63-1.56 (m, 2H, H $\delta$ -7), 1.44 (p, 2H,  $J$  = 7.8 Hz, H $\gamma$ -7).  $^{13}\text{C}$  NMR ( $\text{D}_2\text{O}$ , 150 MHz):  $\delta$  180.3, 178.3, 176.2, 175.6, 166.2, 166.1, 165.8, 148.1, 148.0, 111.8, 110.9, 79.0, 77.8, 72.9, 72.6, 70.7, 70.5, 69.6, 67.5, 65.9, 65.8, 65.4, 56.5, 53.7, 52.7, 41.8, 33.7, 33.3, 30.7, 29.3, 24.8. MALDI-TOFMS:  $[\text{M} + \text{Na}^+]$  calcd for  $\text{C}_{48}\text{H}_{73}\text{N}_{11}\text{O}_{28}\text{Na}^+$ , 1274.4518; found, 1274.452.

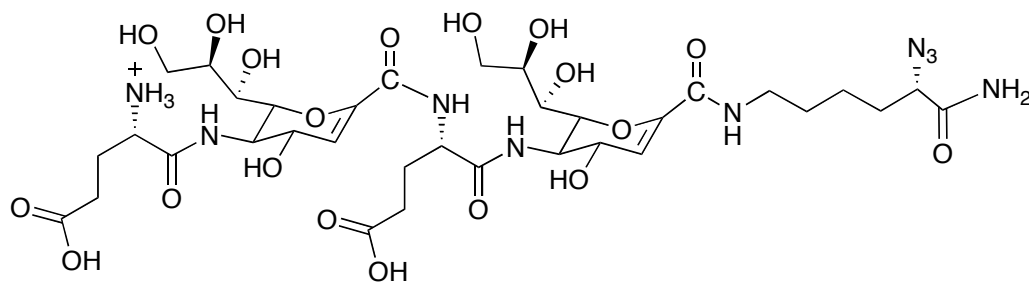

**Neu2en/L-Glu-4 (9):** obtained in 28% purified yield.  $^1\text{H}$  NMR ( $\text{D}_2\text{O}$ , 600 MHz): d 5.89 (d, 1H,  $J = 2.4$  Hz, H3-2), 5.83 (d, 1H,  $J = 1.8$  Hz, H3-4), 4.53 (dd, 1H,  $J = 9.0, 2.4$  Hz, H4-2), 4.52 (dd, 1H,  $J = 9.0, 2.4$  Hz, H4-4), 4.49 (dd, 1H,  $J = 9.0, 5.4$  Hz, H $\alpha$ -1), 4.42 (d, 1H,  $J = 10.8$  Hz, H6-2), 4.39 (d, 1H,  $J = 10.8$  Hz, H6-4), 4.22 (dd, 1H,  $J = 10.8, 9.0$  Hz, H5-2), 4.16-4.12 (m, 2H, H $\alpha$ -5, H5-4), 4.11 (m, 1H, H $\alpha$ -3), 4.00 (ddd, 1H,  $J = 9.6, 5.4, 2.4$  Hz, H8-2), 3.96-3.86 (m, 2H, H8-4, H9'-2), 3.72 (d, 1H,  $J = 10.2$  Hz, H7-2), 3.70-3.69 (m, 2H, H9-2/4), 3.68 (d, 1H,  $J = 10.8$  Hz, H7-4), 3.38-3.28 (m, 2H, H $\epsilon$ -5), 2.66-2.51 (m, 4H, H $\gamma$ -1/3), 2.35-2.10 (m, 4H, H $\beta$ -1/3), 1.89-1.77 (m, 2H, H $\beta$ -5), 1.65-1.57 (m, 2H, H $\delta$ -5), 1.44 (p, 2H,  $J = 7.8$  Hz, H $\gamma$ -5).  $^{13}\text{C}$  NMR ( $\text{D}_2\text{O}$ , 150 MHz): d 180.0, 179.0, 178.1, 176.2, 172.4, 166.3, 166.1, 148.2, 147.6, 111.8, 110.8, 78.9, 72.7, 72.5, 70.6, 70.5, 69.7, 65.8, 65.7, 56.4, 55.6, 52.9, 41.9, 33.7, 32.8, 32.0, 30.6, 28.9, 24.8. MALDI-TOFMS:  $[\text{M} + \text{Na}^+]$  calcd for  $\text{C}_{34}\text{H}_{53}\text{N}_9\text{O}_{19}\text{Na}^+$ , 914.3350; found, 914.3320.

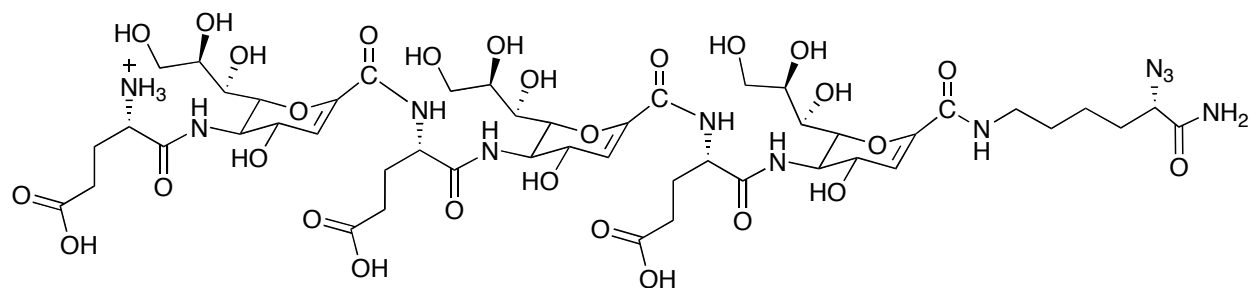

**Neu2en/L-Glu-6 (10):** obtained in 15% purified yield. <sup>1</sup>H NMR (D<sub>2</sub>O, 600 MHz): δ 5.88 (d, 1H, *J* = 2.4 Hz, H3-2), 5.87 (d, 1H, *J* = 2.4 Hz, H3-4), 5.82 (d, 1H, *J* = 2.4 Hz, H3-6), 4.54 (dd, 3H, 9.0, 3.0 Hz, H4-2/4/6), 4.43-4.37 (m, 5H, H6-6, H $\alpha$ -5, H6-4, H $\alpha$ -3, H6-2), 4.22 (dd, 1H, *J* = 10.2, 8.4 Hz, H5-2), 4.17-4.11 (m, 3H, H $\alpha$ -7, H5-4/6), 4.08 (t, 1H, *J* = 6.6 Hz, H $\alpha$ -1), 4.01 (ddd, 1H, *J* = 9.0, 5.4, 2.4 Hz, H8-2), 3.97 (ddd, 1H, *J* = 12.0, 6.0, 2.4 Hz, H8-4), 3.92-3.86 (m, 3H, H8-C<sub>a</sub>, H9<sup>2</sup>-2/4), 3.91-3.85 (m, 7H, H7-2/4/6, H9-2/4/6, H9<sup>2</sup>-6), 3.36-3.28 (m, 2H, H $\epsilon$ -7), 2.45-2.35 (m, 6H, H $\gamma$ -1/3/5), 2.18-2.07 (m, 6H, H $\beta$ -1/3/5), 1.78-1.88 (m, 2H, H $\beta$ -7), 1.65-1.59 (m, 2H, H $\delta$ -7), 1.44 (p, 2H, *J* = 7.8 Hz, H $\gamma$ -7). <sup>13</sup>C NMR (D<sub>2</sub>O, 150 MHz): δ 179.9, 179.8, 178.7, 177.9, 176.0, 172.4, 166.2, 166.1, 166.0, 148.1, 147.4, 111.7, 111.5, 111.0, 78.8, 72.7, 72.5, 70.5, 69.5, 66.5, 65.8, 65.6, 57.1, 56.0, 52.8, 52.7, 41.8, 35.6, 33.7, 30.7, 30.1, 24.8. MALDI-TOFMS: [M + Na<sup>+</sup>] calcd for C<sub>48</sub>H<sub>73</sub>N<sub>11</sub>O<sub>28</sub>Na<sup>+</sup>, 1274.4518; found, 1274.456.

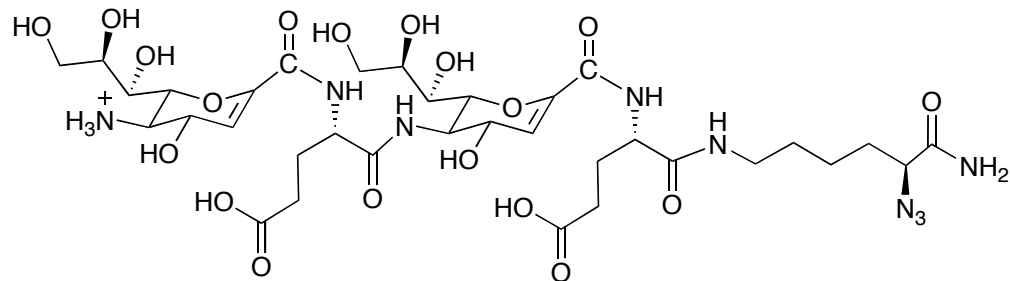

**L-Glu/Neu2en-4 (11):** obtained in 24% purified yield.  $^1\text{H}$  NMR ( $\text{D}_2\text{O}$ , 600 MHz): d 5.96 (d, 1H,  $J = 2.4$  Hz, H3-1), 5.91 (d, 1H,  $J = 2.4$  Hz, H3-3), 4.67 (dd, 1H,  $J = 8.4, 3.0$  Hz, H4-1), 4.64 (dd, 1H,  $J = 9.6, 2.4$  Hz, H6-1), 4.57 (dd, 1H,  $J = 9.0, 2.4$  Hz, H4-3), 4.52 (dd, 1H,  $J = 8.4, 5.4$  Hz,  $\text{H}\alpha$ -2), 4.44 (dd, 1H,  $J = 7.2, 4.2$  Hz,  $\text{H}\alpha$ -4), 4.44 (dd, 1H,  $J = 10.8, 1.2$  Hz, H6-3), 4.19 (dd, 1H,  $J = 10.8, 9.0$  Hz, H5-3), 4.15 (dd, 1H,  $J = 7.2, 5.4$  Hz,  $\text{H}\alpha$ -5), 4.08 (ddd, 1H,  $J = 9.0, 6.0, 3.0$  Hz, H8-1), 4.00 (ddd, 1H,  $J = 9.0, 6.0, 3.0$  Hz, H8-3), 3.94 (dd, 1H,  $J = 12.0, 3.0$  Hz, H9'-1), 3.92 (dd, 1H,  $J = 8.4, 1.2$  Hz, H7-1), 3.91 (dd, 1H,  $J = 12.0, 3.0$  Hz, H9'-3), 3.80 (dd, 1H,  $J = 12.0, 5.4$  Hz, H9-1), 3.72 (dd, 1H,  $J = 9.6, 1.2$  Hz, H7-3), 3.71 (dd, 1H,  $J = 12.0, 6.0$  Hz, H9-3), 3.66 (dd, 1H,  $J = 9.6, 8.4$  Hz, H5-1), 3.31-3.22 (m, 2H,  $\text{H}\epsilon$ -5), 2.57 (dd, 4H,  $J = 7.2, 7.2$  Hz,  $\text{H}\gamma$ '-2/4), 2.53 (dd, 4H,  $J = 7.2, 7.2$  Hz,  $\text{H}\gamma$ -2/4), 2.28-2.07 (m, 4H,  $\text{H}\beta$ -2/4), 1.90-1.78 (m, 2H,  $\text{H}\beta$ -5), 1.64-1.55 (m, 2H,  $\text{H}\delta$ -5), 1.44 (p, 2H,  $J = 7.8$  Hz,  $\text{H}\gamma$ -5).  $^{13}\text{C}$  NMR ( $\text{D}_2\text{O}$ , 150 MHz): d 180.3, 180.2, 178.4, 176.5, 175.6, 166.3, 165.9, 148.1, 148.0, 112, 110.9, 79.1, 77.9, 72.8, 72.7, 70.7, 70.5, 69.7, 67.6, 66.0, 65.8, 65.4, 56.4, 56.3, 53.7, 52.8, 41.9, 33.7, 33.0, 30.6, 29.2, 29.0, 24.8. MALDI-TOFMS:  $[\text{M} + \text{Na}^+]$  calcd for  $\text{C}_{34}\text{H}_{53}\text{N}_9\text{O}_{19}\text{Na}^+$ , 914.3350; found, 914.3330.

**Figure S1.** Mass spectra of  $\alpha/\delta$ -hybrid peptides (**5-12**).

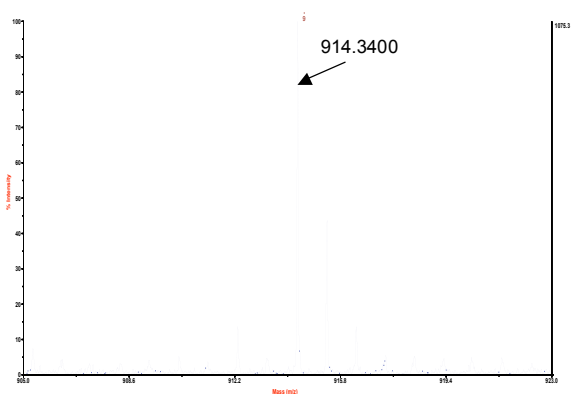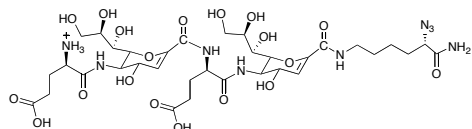

**5**

$C_{34}H_{53}N_9O_{19}Na^+$   
 Found = 914.3400  
 Theor. = 914.3350

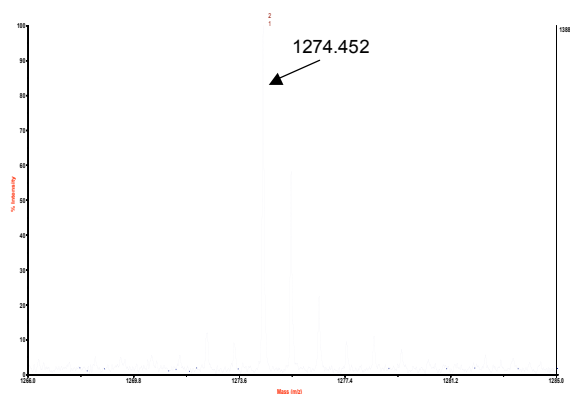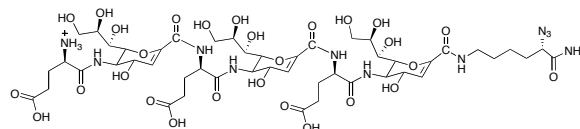

**6**

$C_{48}H_{73}N_{11}O_{28}Na^+$   
 Found = 1274.452  
 Theor. = 1274.4518

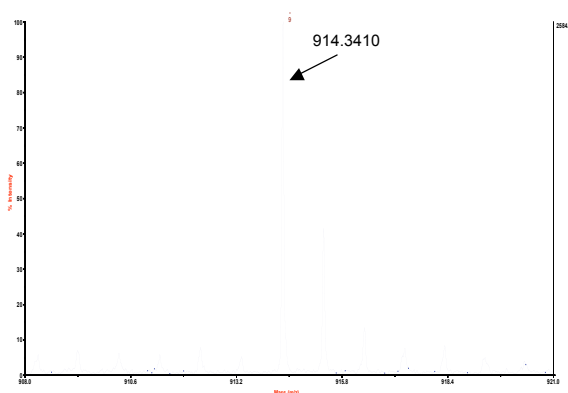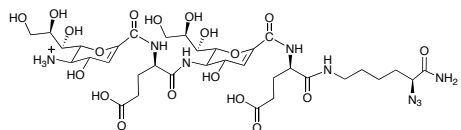

**7**

$C_{34}H_{53}N_9O_{19}Na^+$   
 Found = 914.3410  
 Theor. = 914.3350

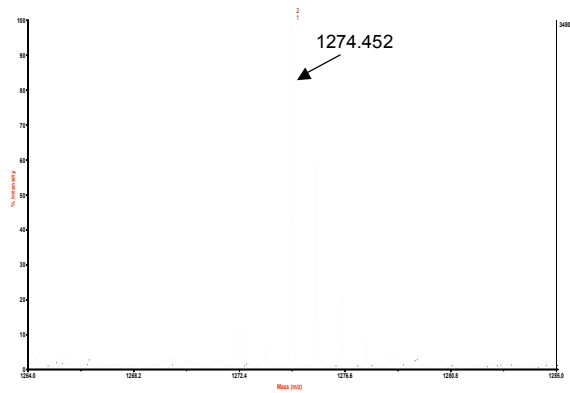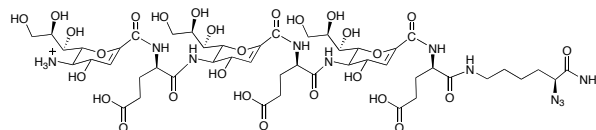

**8**

$C_{48}H_{73}N_{11}O_{28}Na^+$   
 Found = 1274.452  
 Theor. = 1274.4518

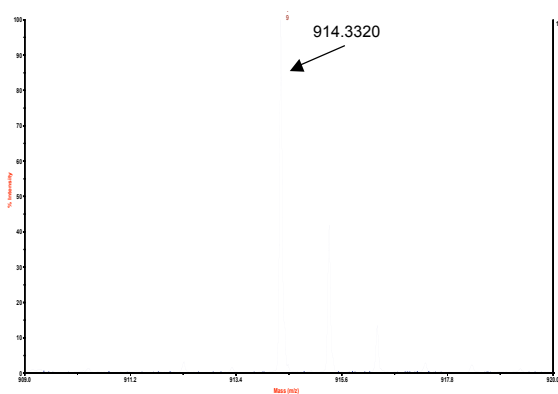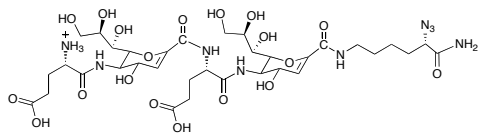

**9**

$C_{34}H_{53}N_9O_{19}Na^+$   
 Found = 914.3320  
 Theor. = 914.3350

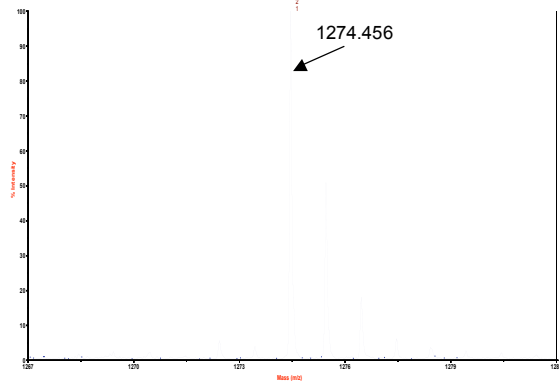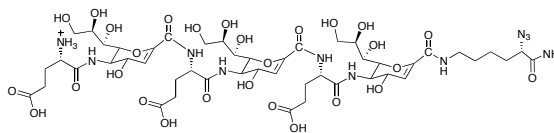

**10**

$C_{48}H_{73}N_{11}O_{28}Na^+$   
 Found = 1274.456  
 Theor. = 1274.4518

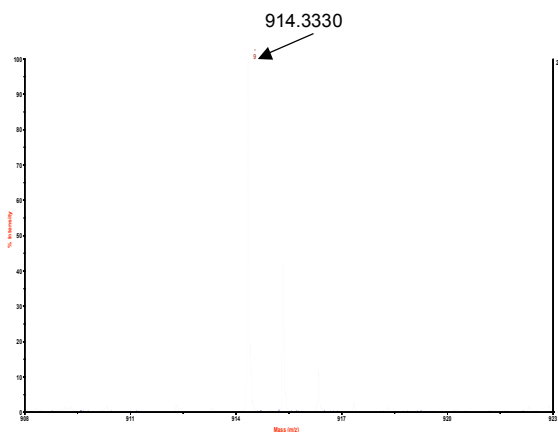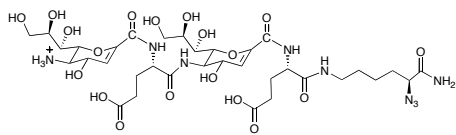

**11**

$C_{34}H_{53}N_9O_{19}Na^+$   
 Found = 914.3330  
 Theor. = 914.3350

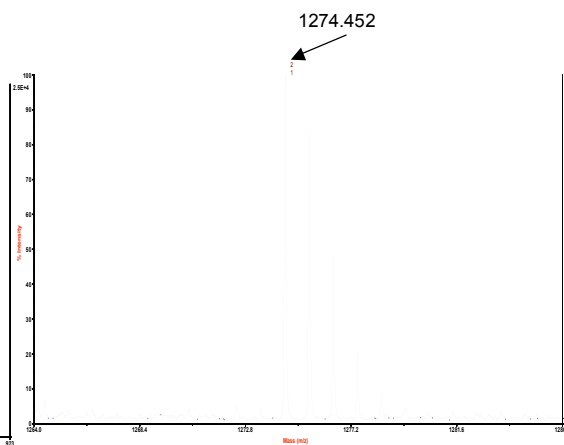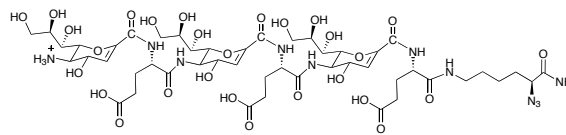

**12**

$C_{48}H_{73}N_{11}O_{28}Na^+$   
 Found = 1274.452  
 Theor. = 1274.4518

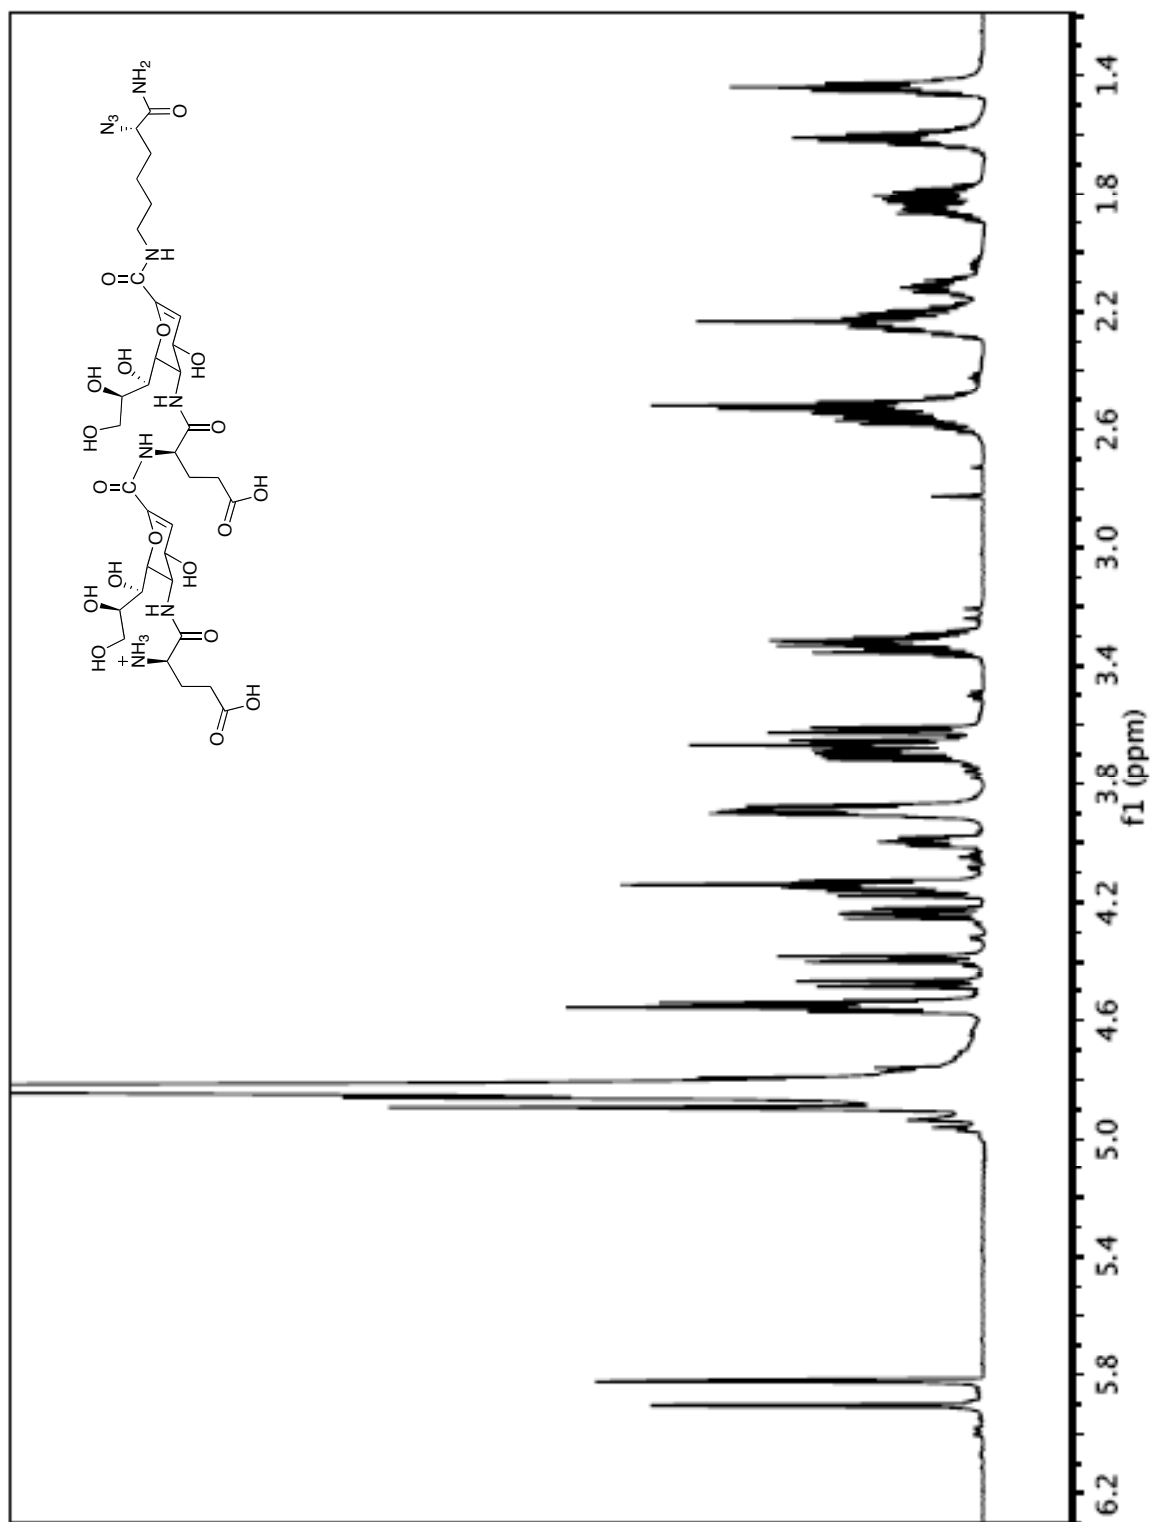

Figure S2. <sup>1</sup>H NMR spectrum of α/δ-hybrid peptide 5.

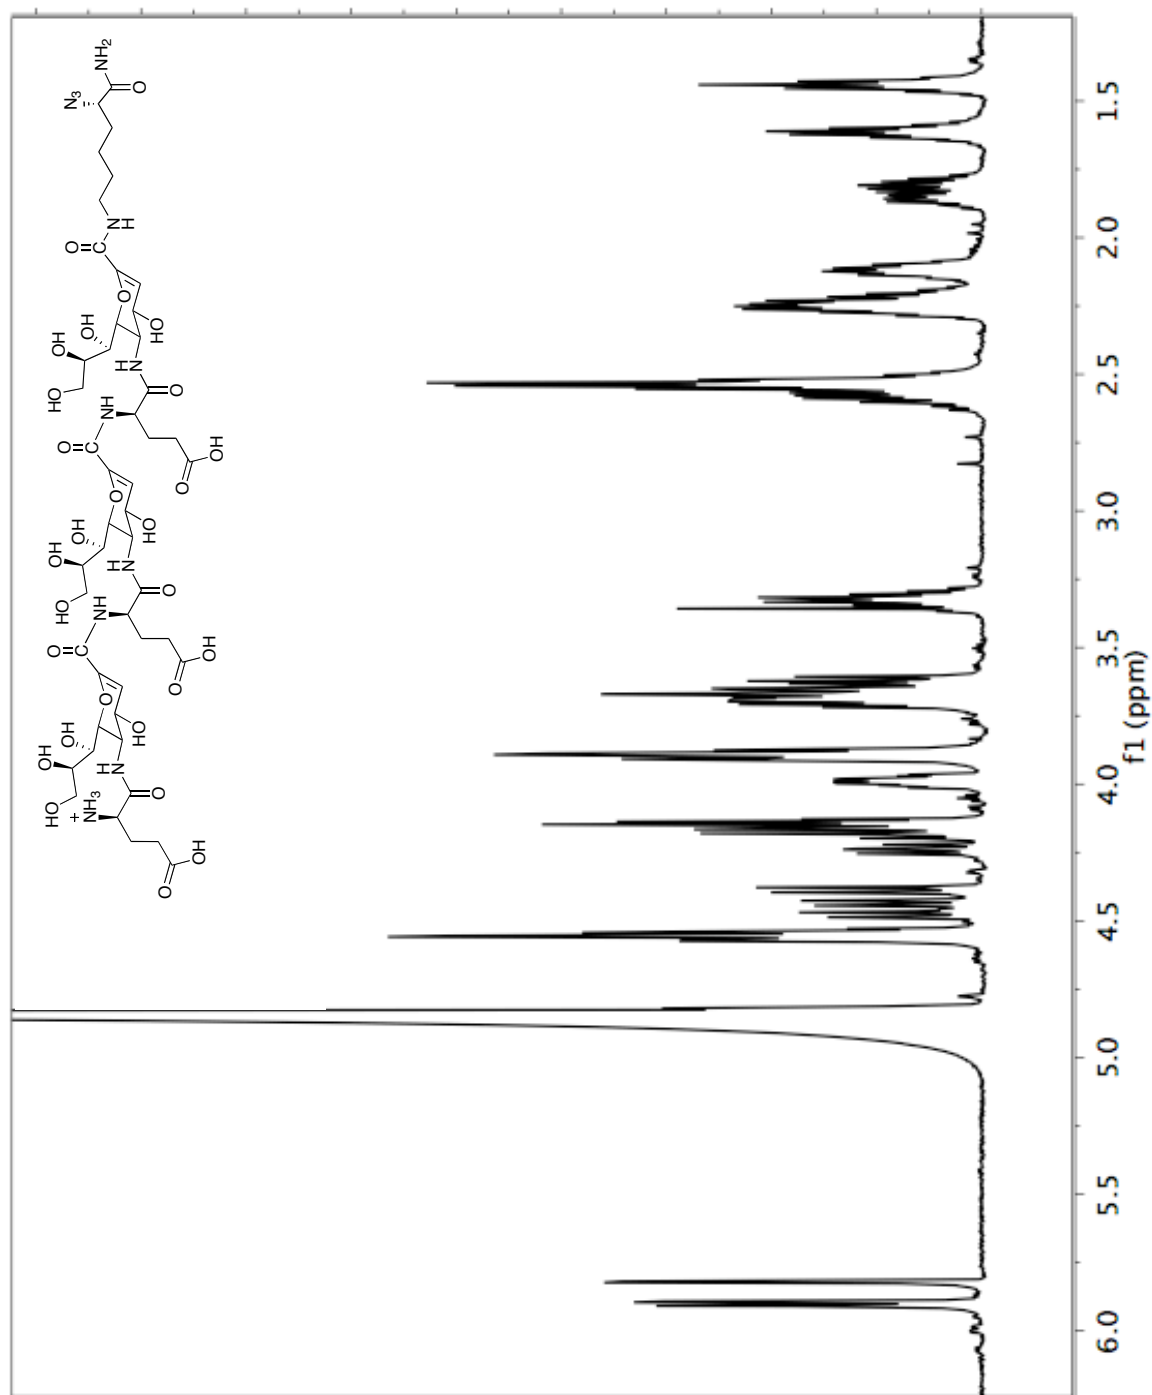

**Figure S3.**  $^1\text{H}$  NMR spectrum of  $\alpha/\delta$ -hybrid peptide **6**.



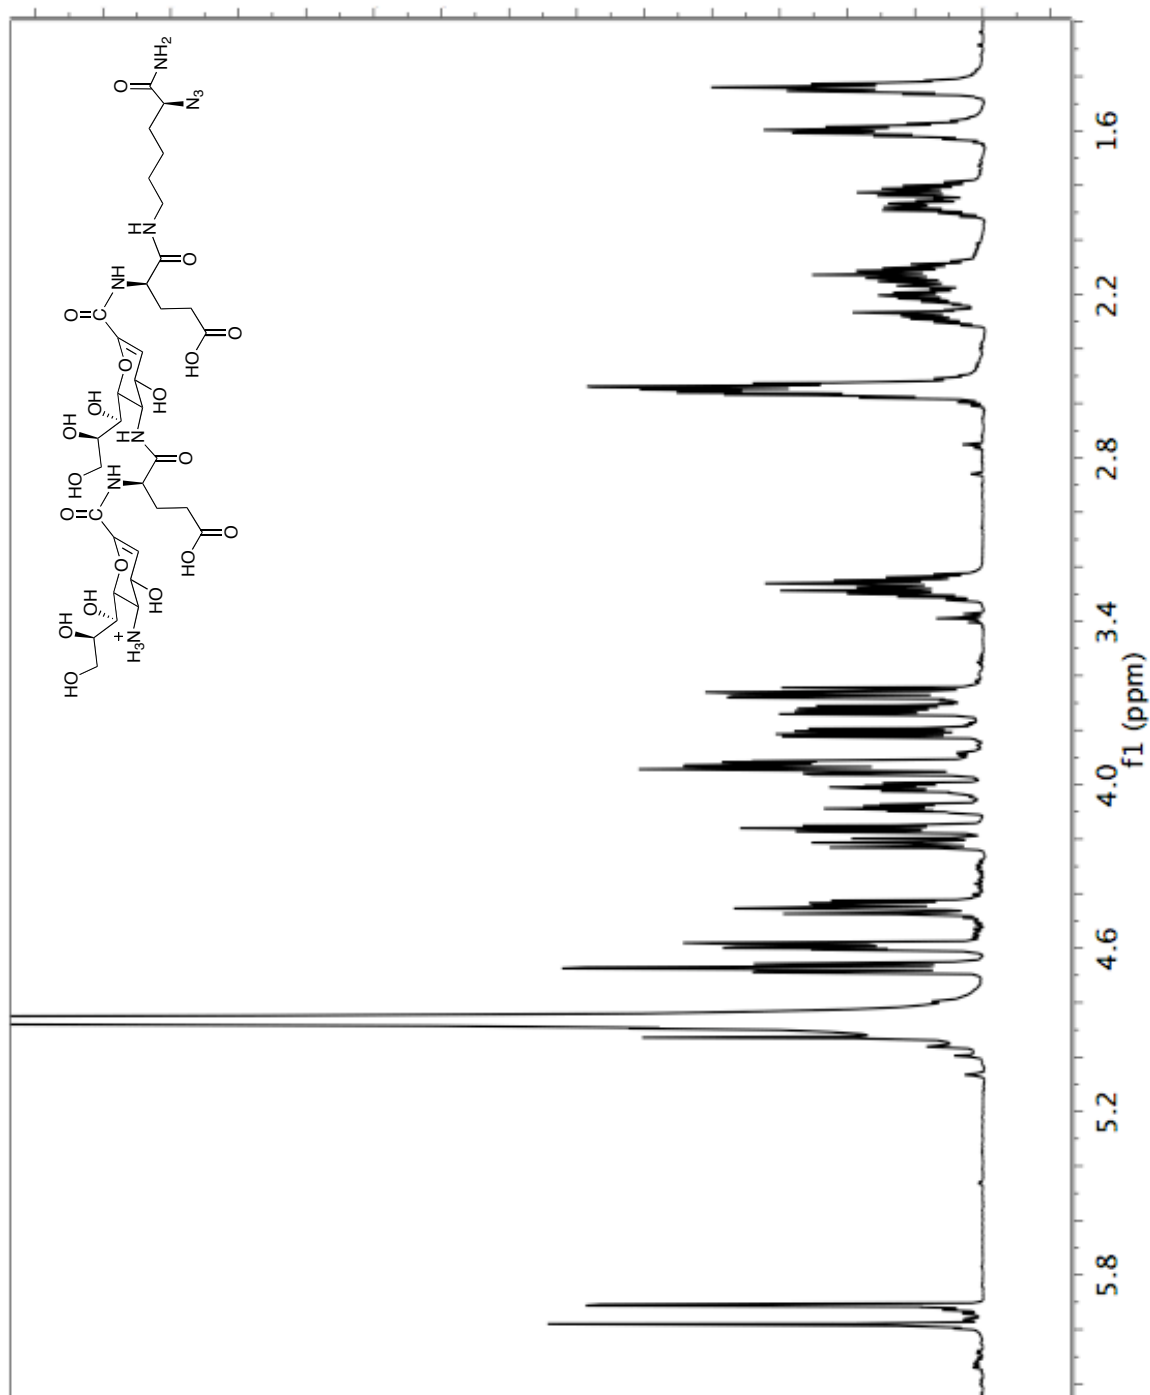

**Figure S4.**  $^1\text{H}$  NMR spectrum of  $\alpha/\delta$ -hybrid peptide 7.

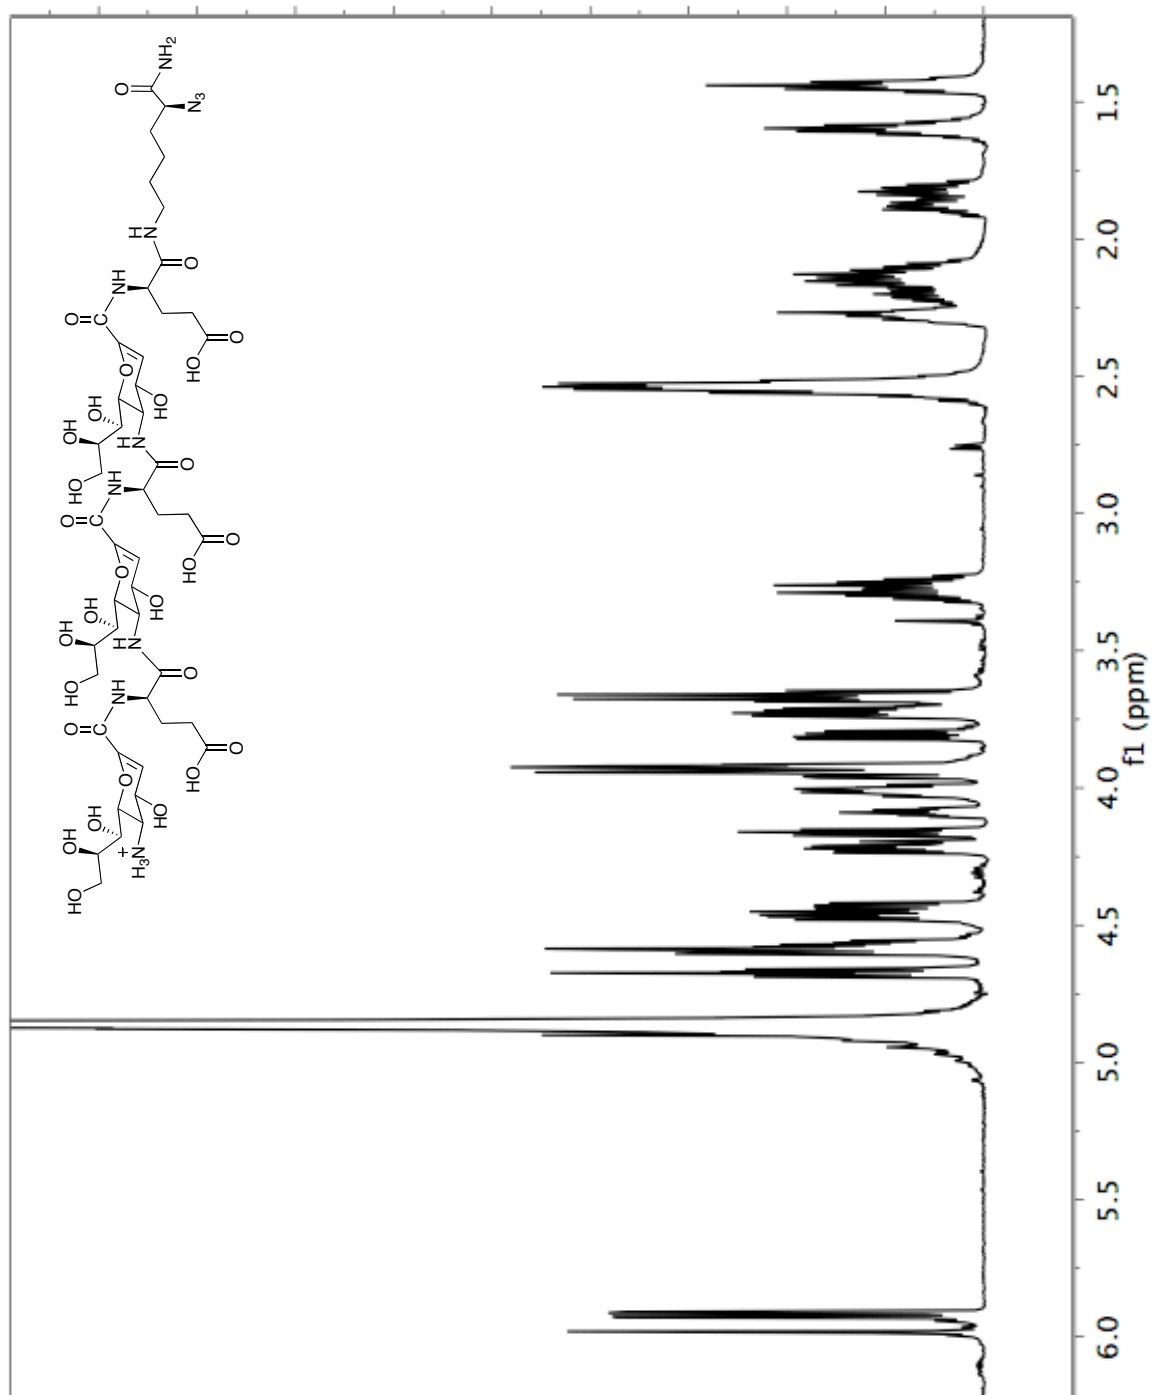

**Figure S5.** <sup>1</sup>H NMR spectrum of α/δ-hybrid peptide **8**.

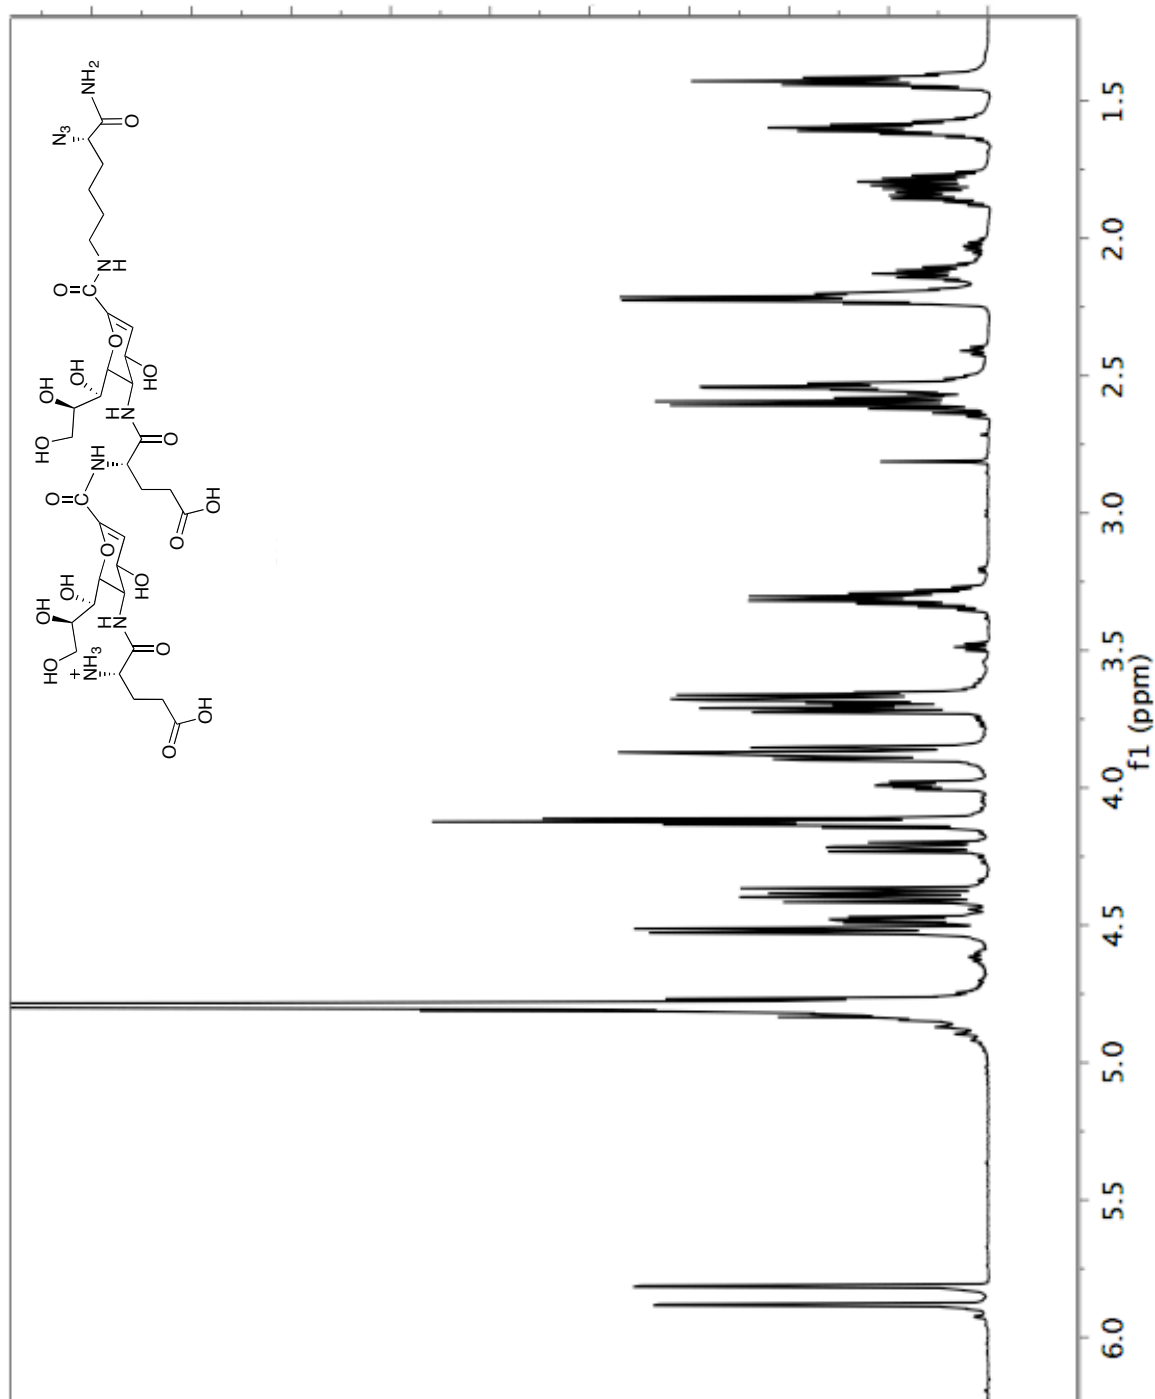

**Figure S6.**  $^1\text{H}$  NMR spectrum of  $\alpha/\delta$ -hybrid peptide **9**.

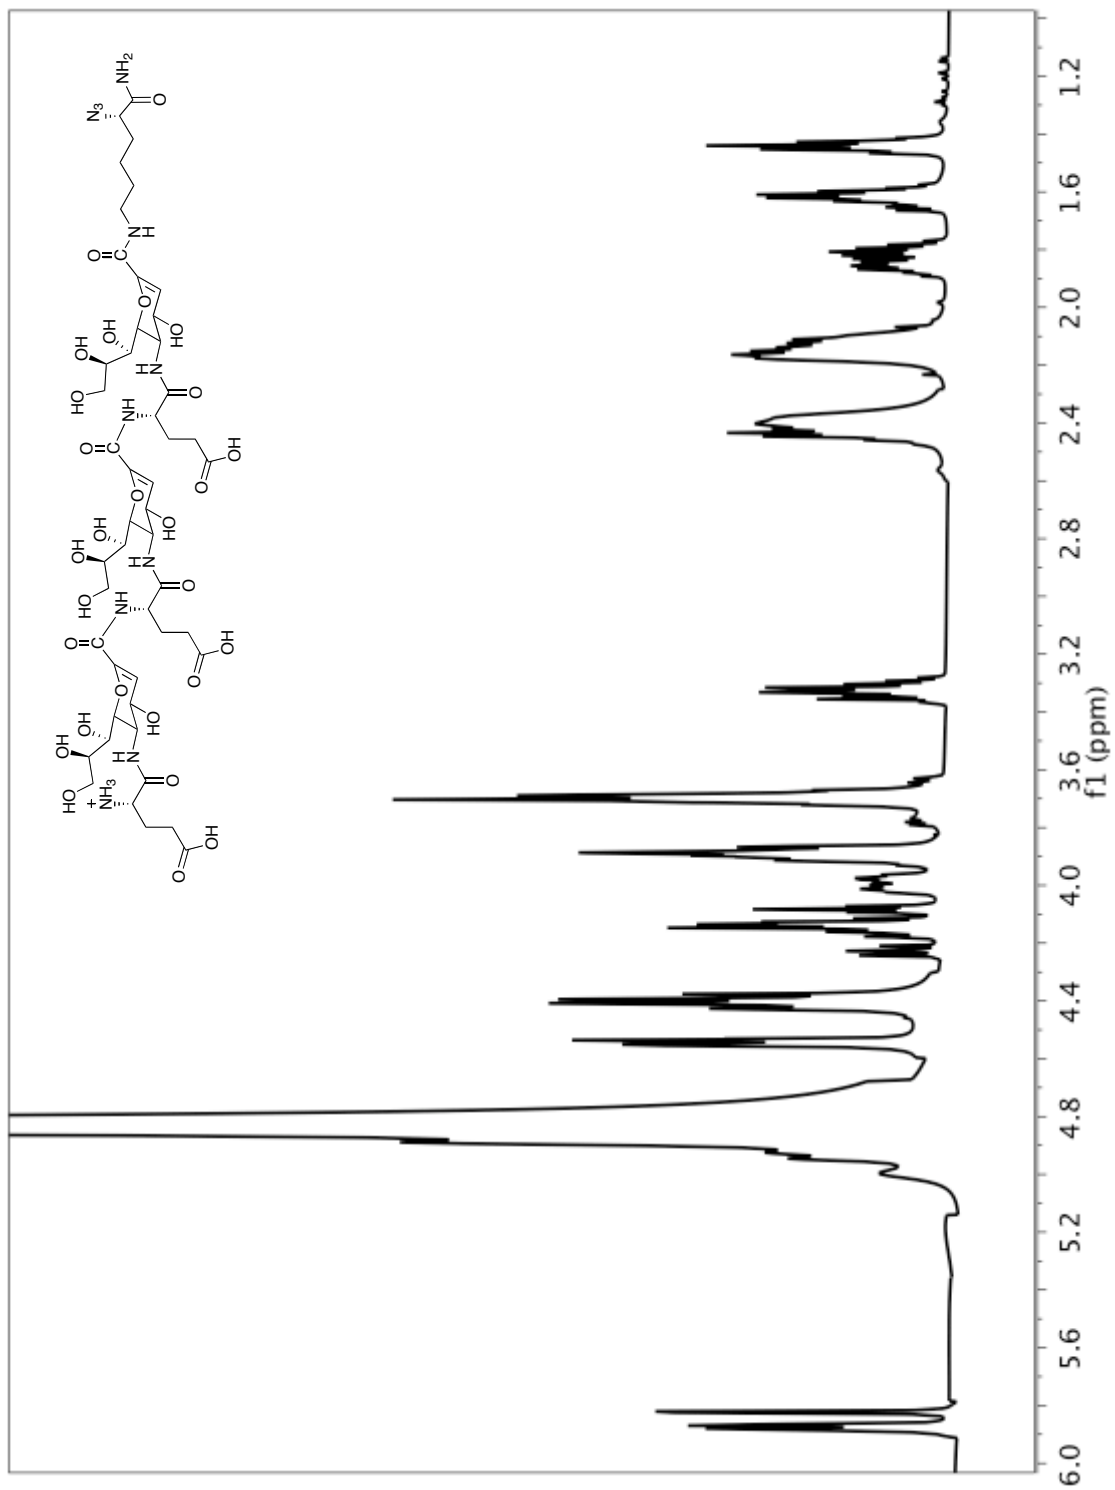

**Figure S7.** <sup>1</sup>H NMR spectrum of α/δ-hybrid peptide **10**.

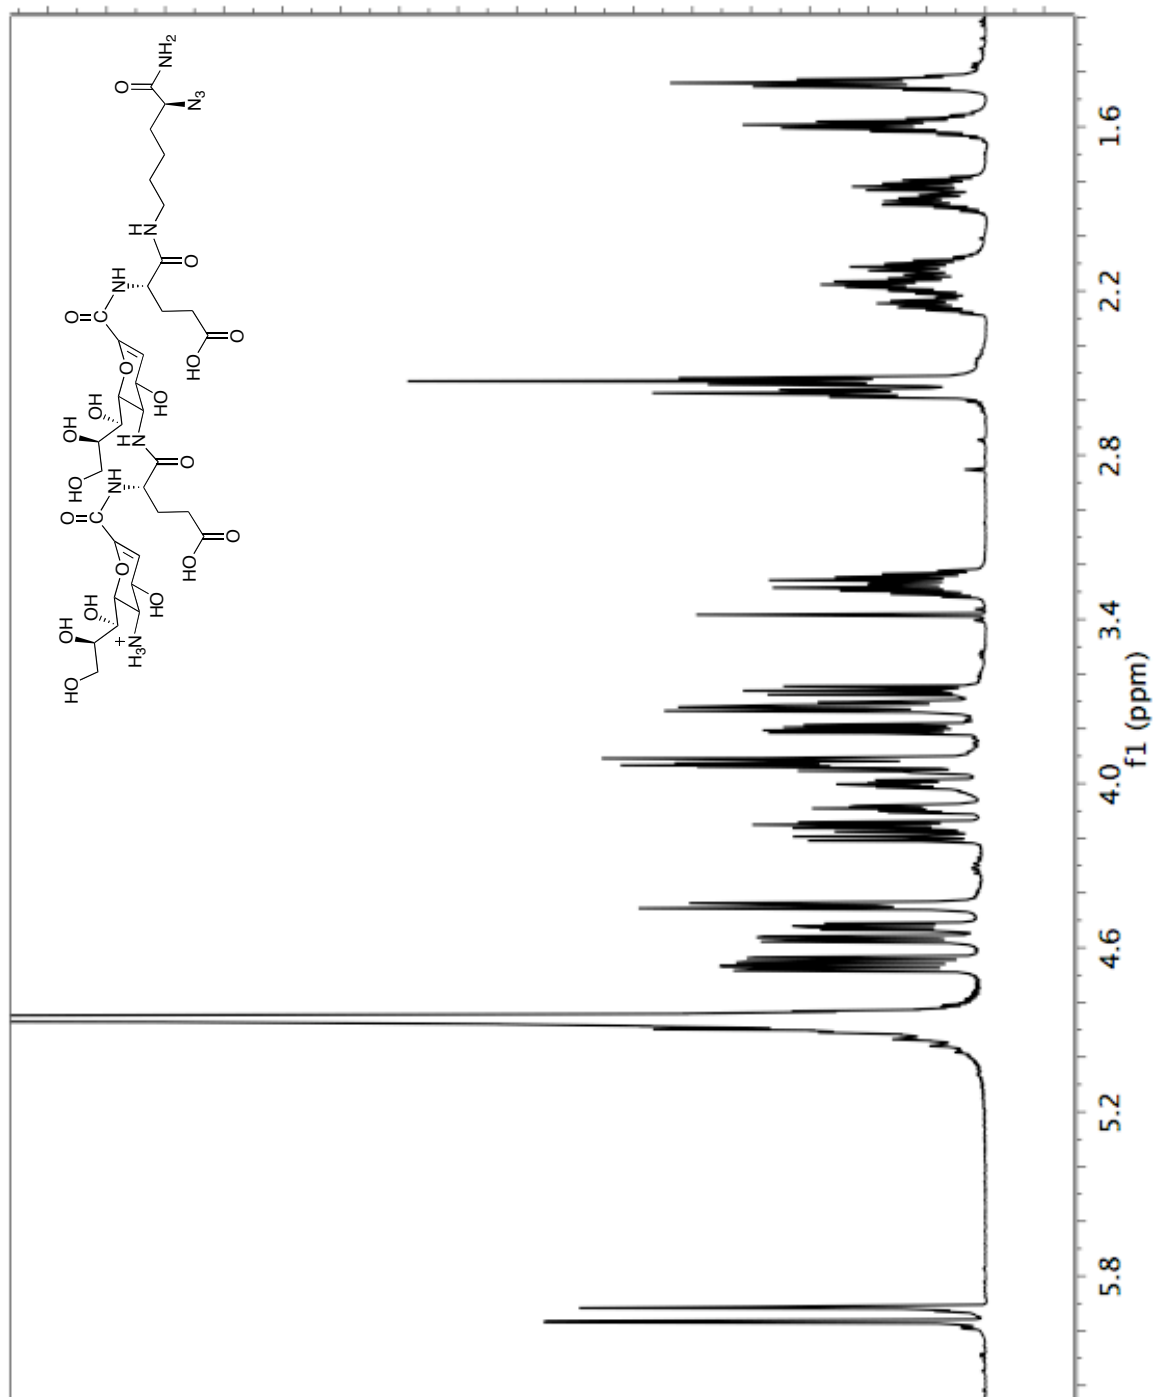

**Figure S8.**  $^1\text{H}$  NMR spectrum of  $\alpha/\delta$ -hybrid peptide 11.

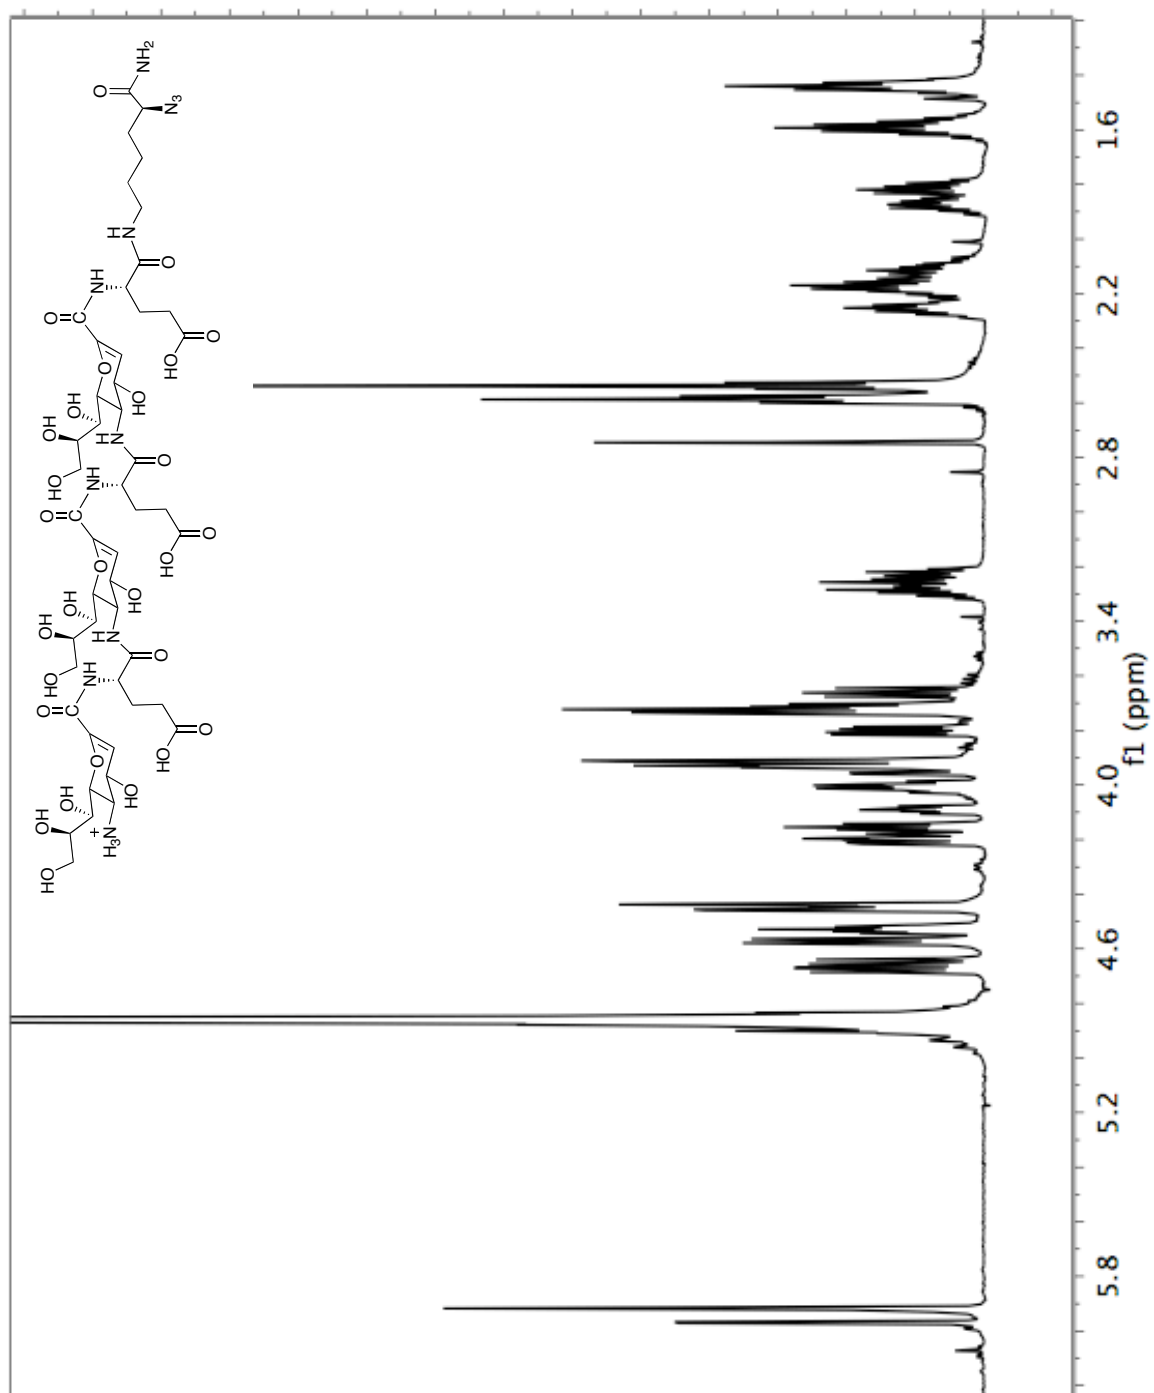

**Figure S9.**  $^1\text{H}$  NMR spectrum of  $\alpha/\delta$ -hybrid peptide 12.

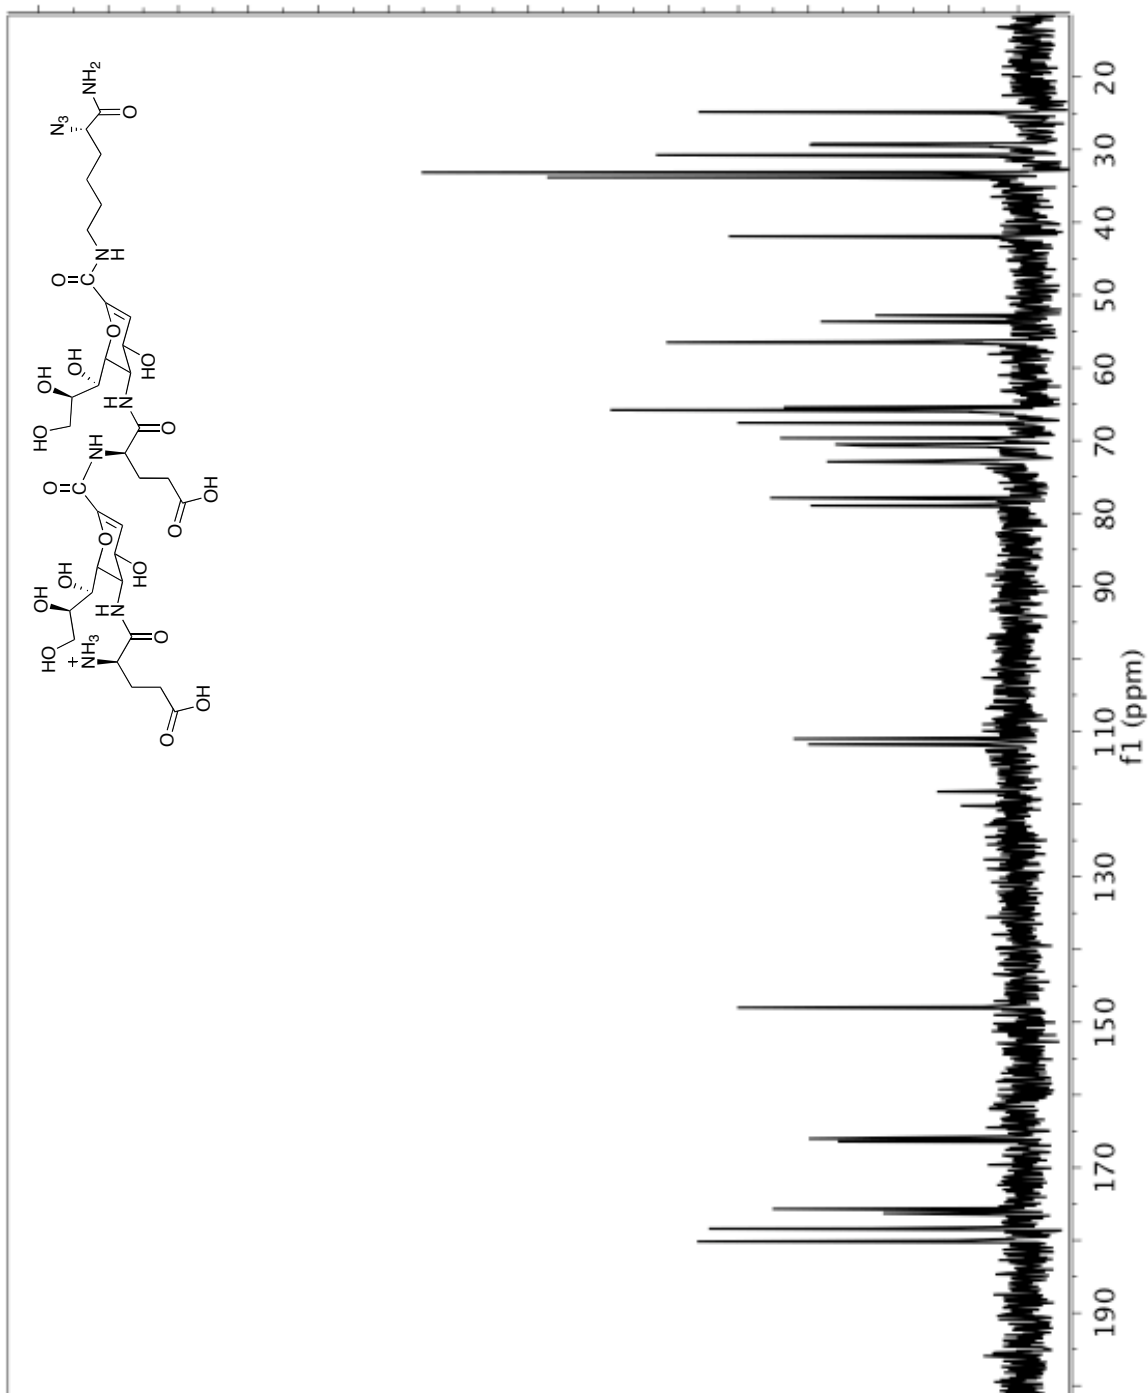

**Figure S10.**  $^{13}\text{C}$  NMR spectrum of  $\alpha/\delta$ -hybrid peptide 5.

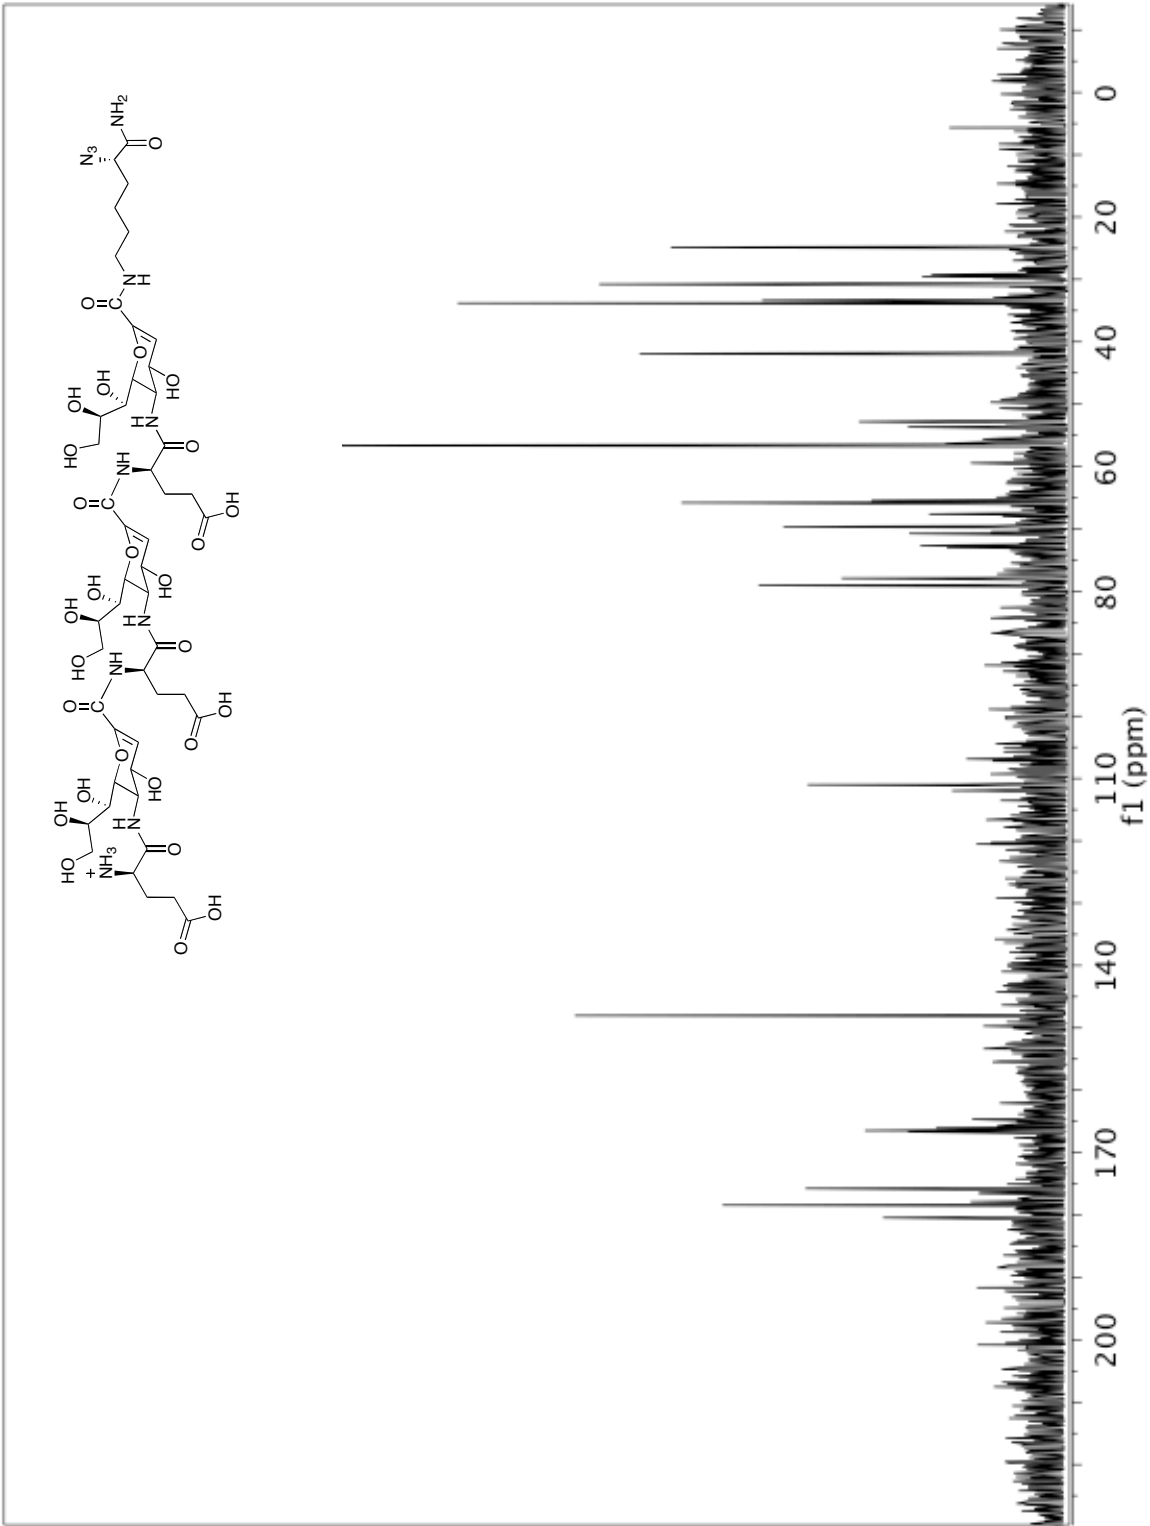

**Figure S11.**  $^{13}\text{C}$  NMR spectrum of  $\alpha/\delta$ -hybrid peptide **6**.



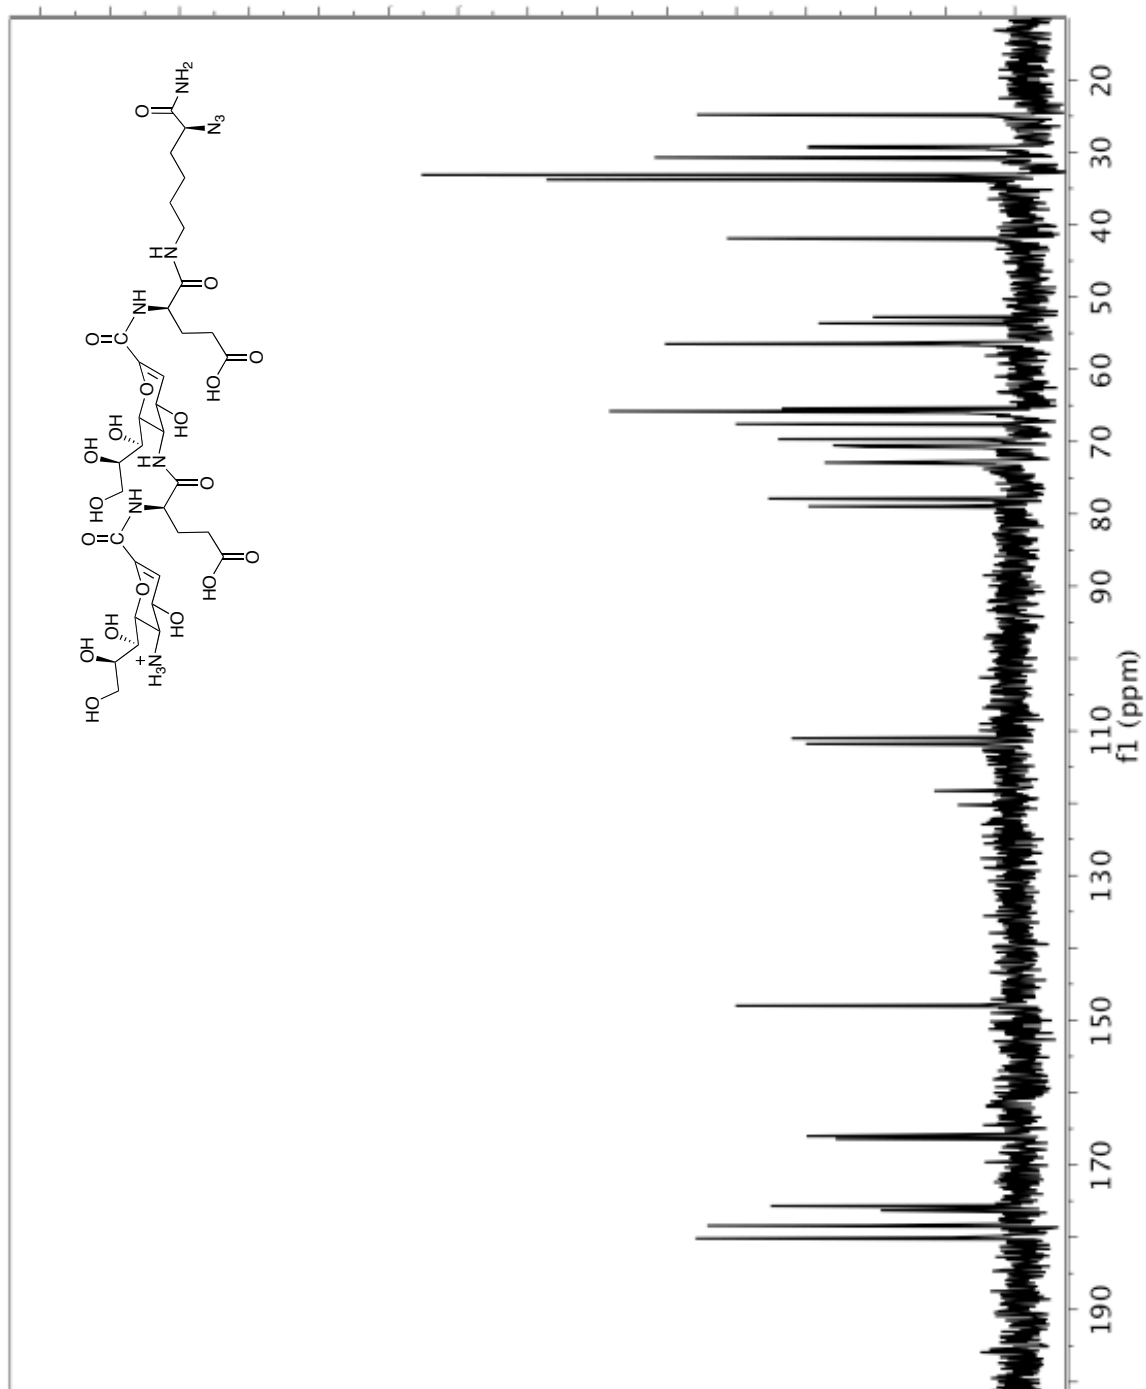

**Figure S12.**  $^{13}\text{C}$  NMR spectrum of  $\alpha/\delta$ -hybrid peptide 7.

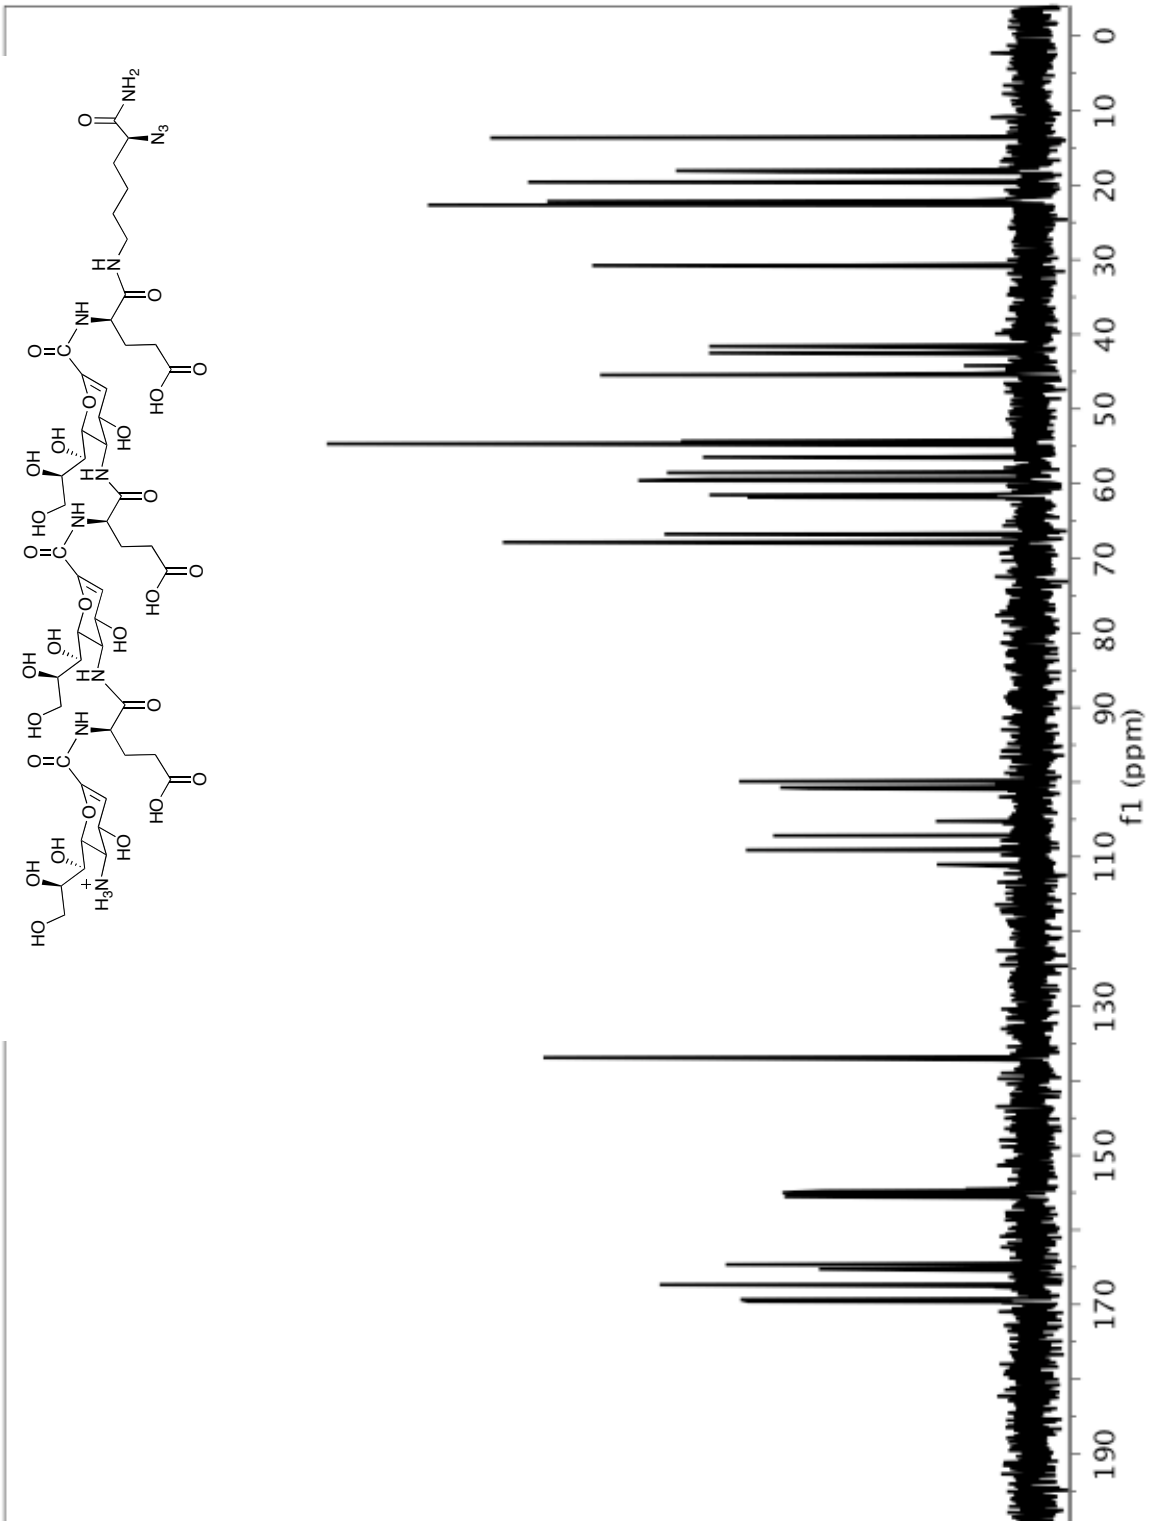

**Figure S13.**  $^{13}\text{C}$  NMR spectrum of  $\alpha/\delta$ -hybrid peptide 8.

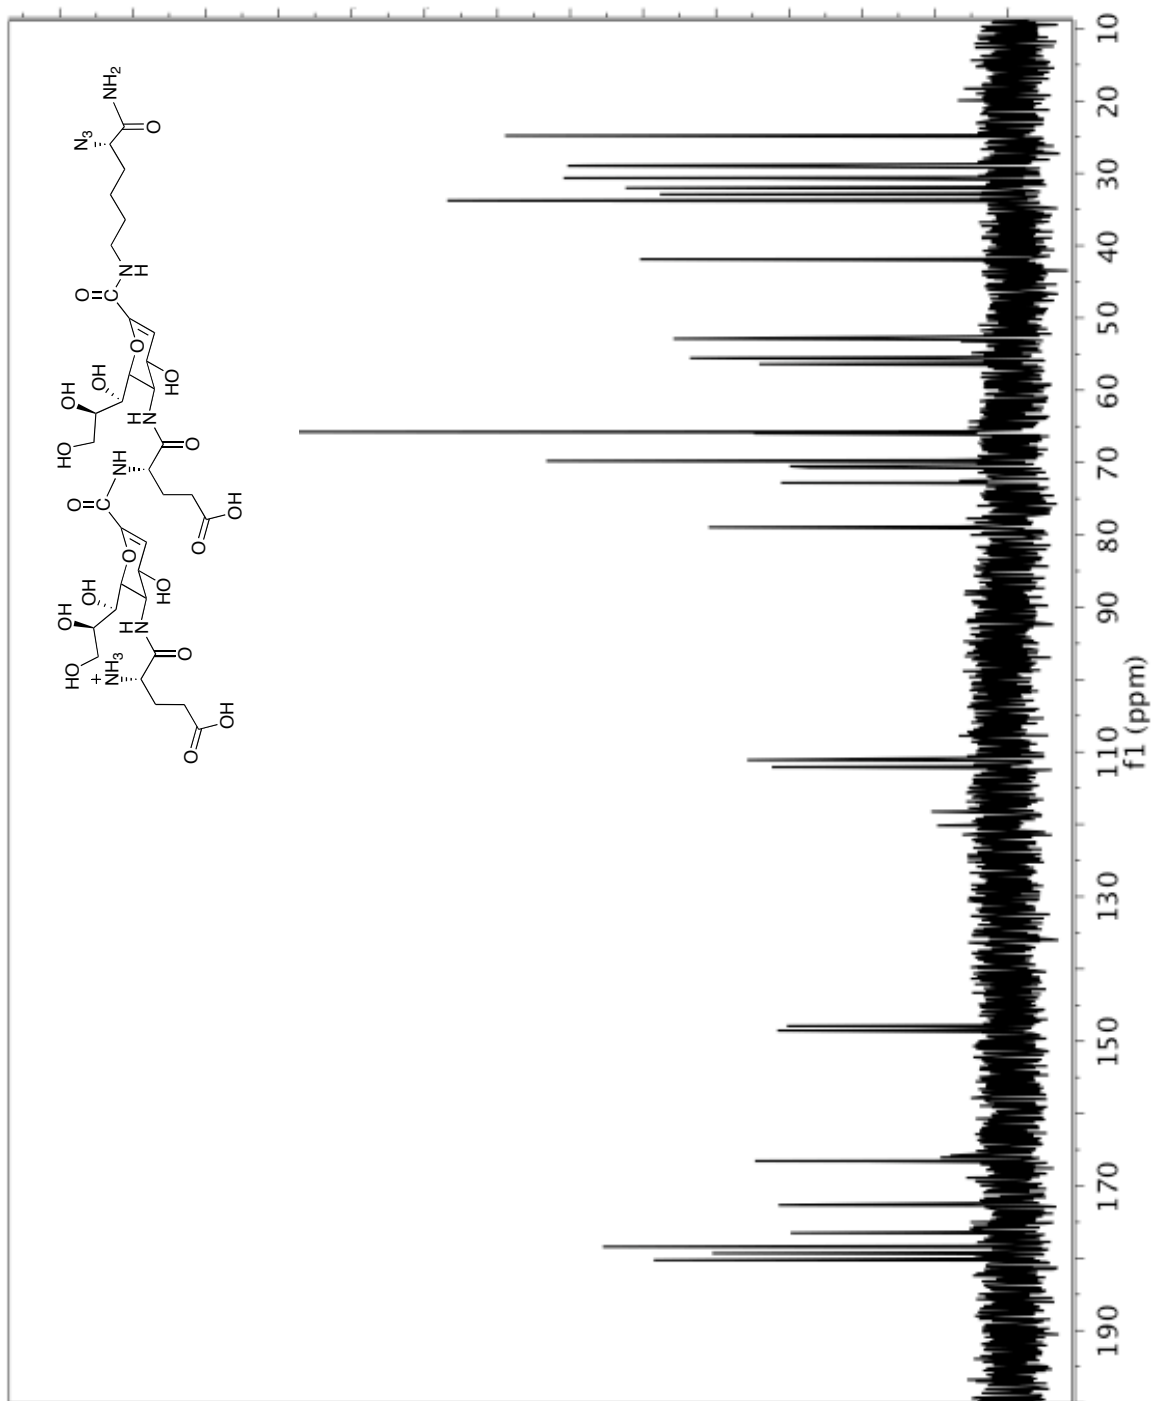

**Figure S14.**  $^{13}\text{C}$  NMR spectrum of  $\alpha/\delta$ -hybrid peptide 9.

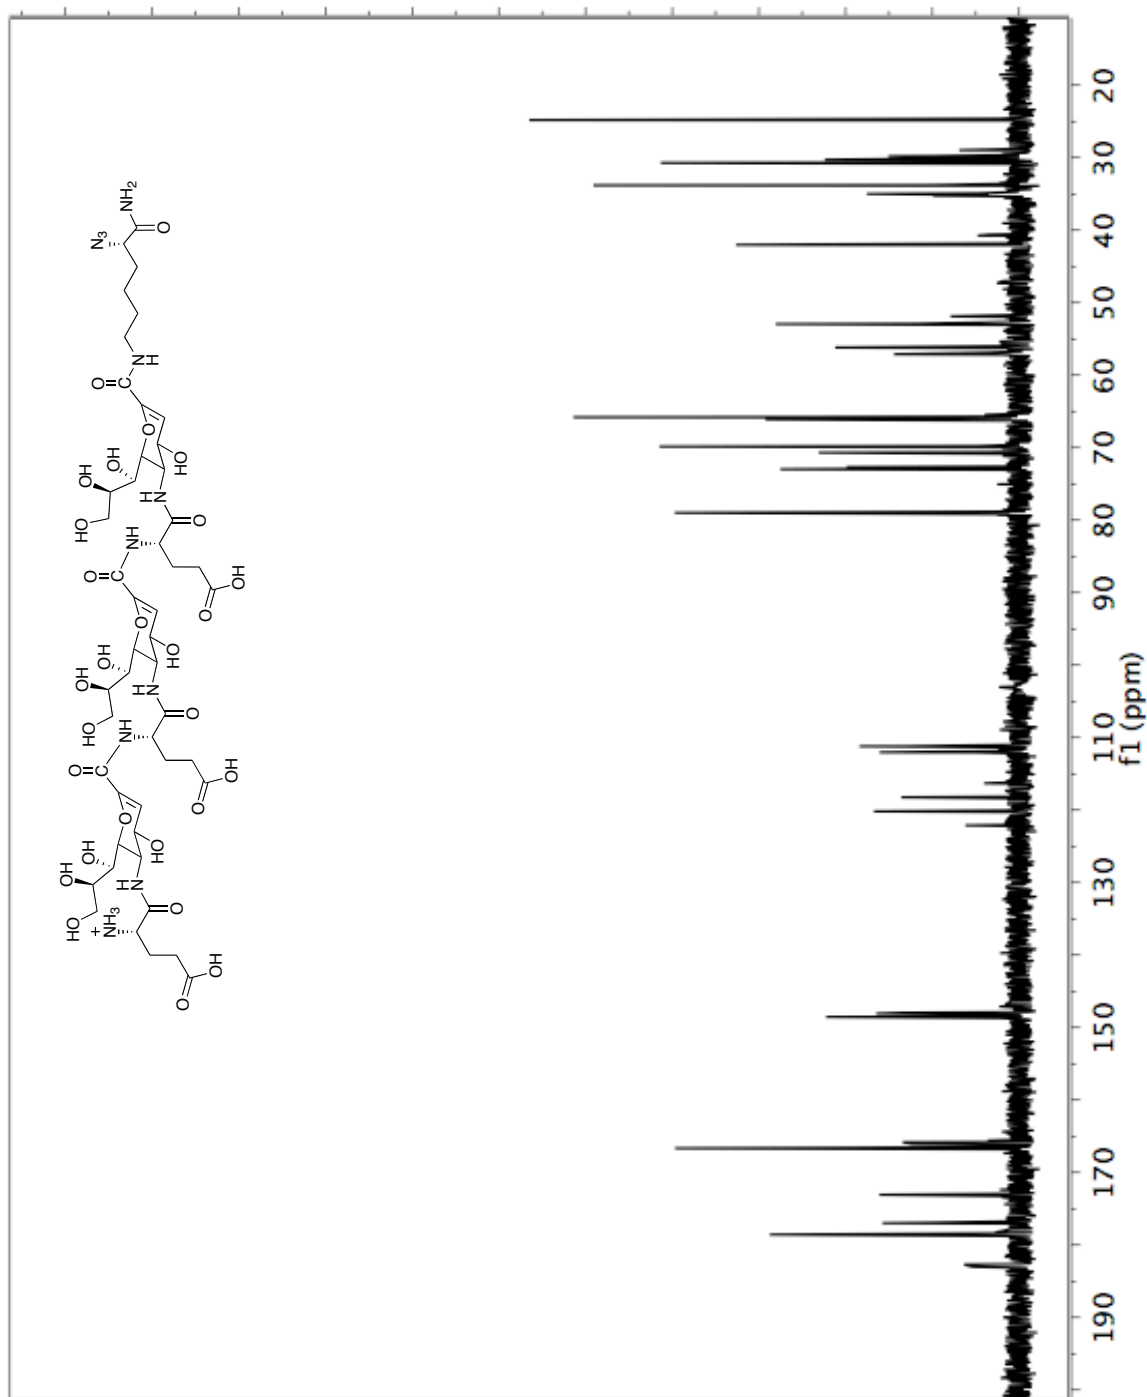

**Figure S15.**  $^{13}\text{C}$  NMR spectrum of  $\alpha/\delta$ -hybrid peptide 10.

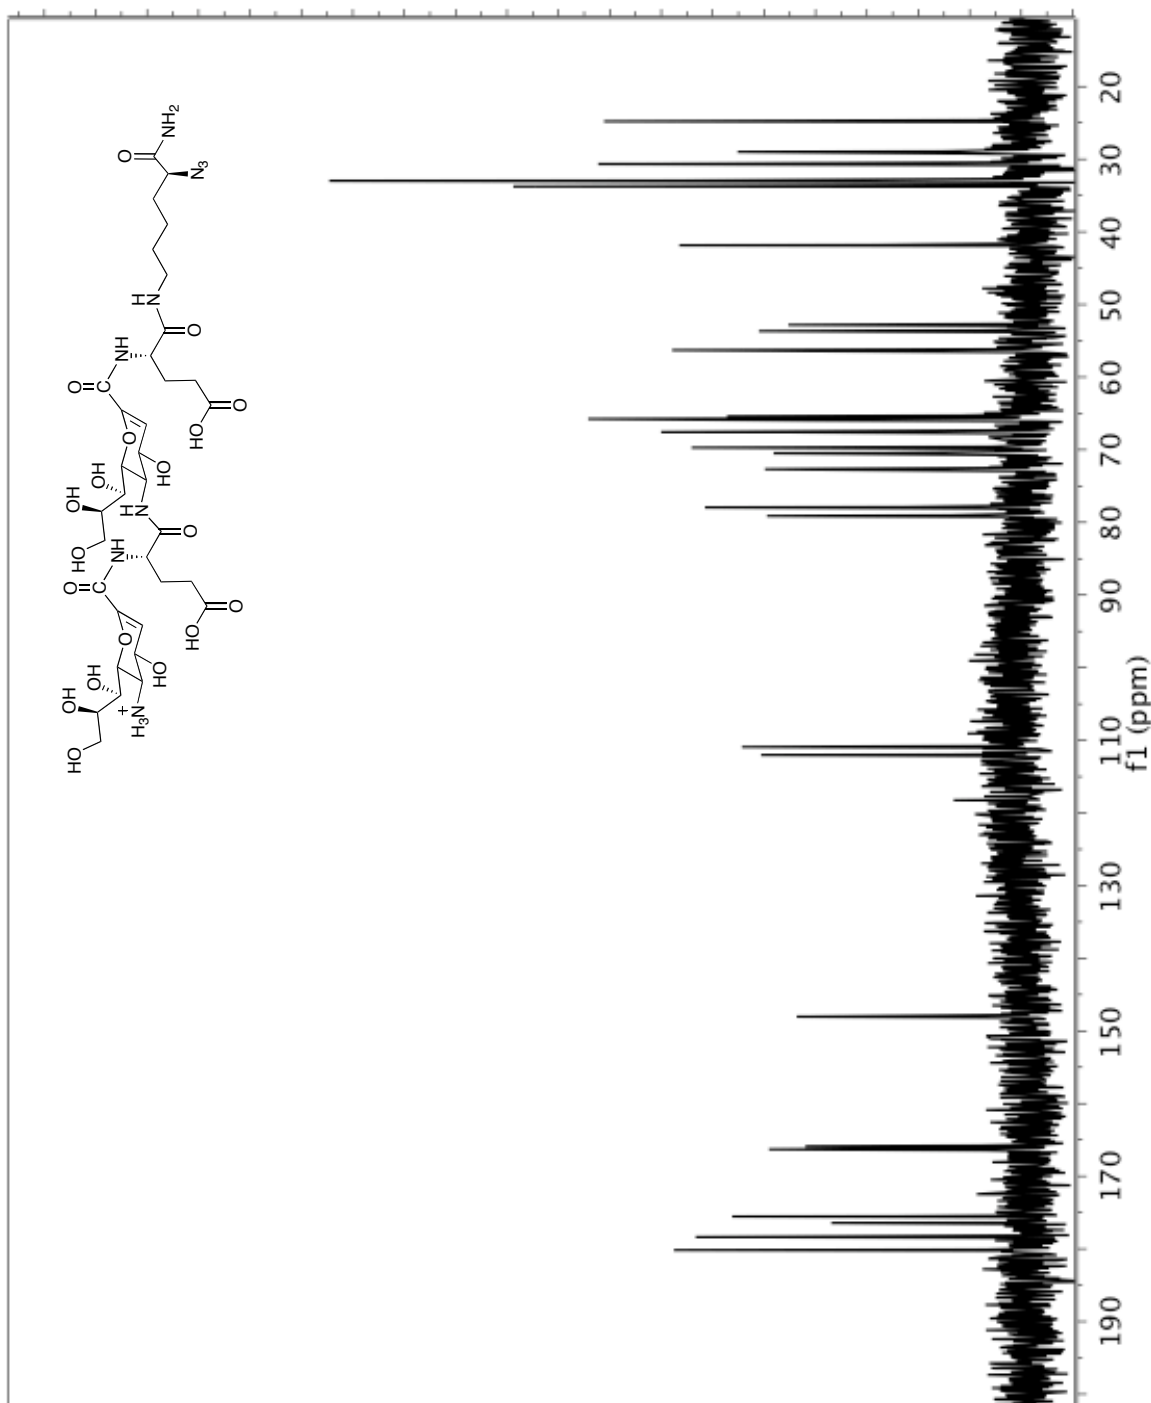

**Figure S16.**  $^{13}\text{C}$  NMR spectrum of  $\alpha/\delta$ -hybrid peptide **11**.

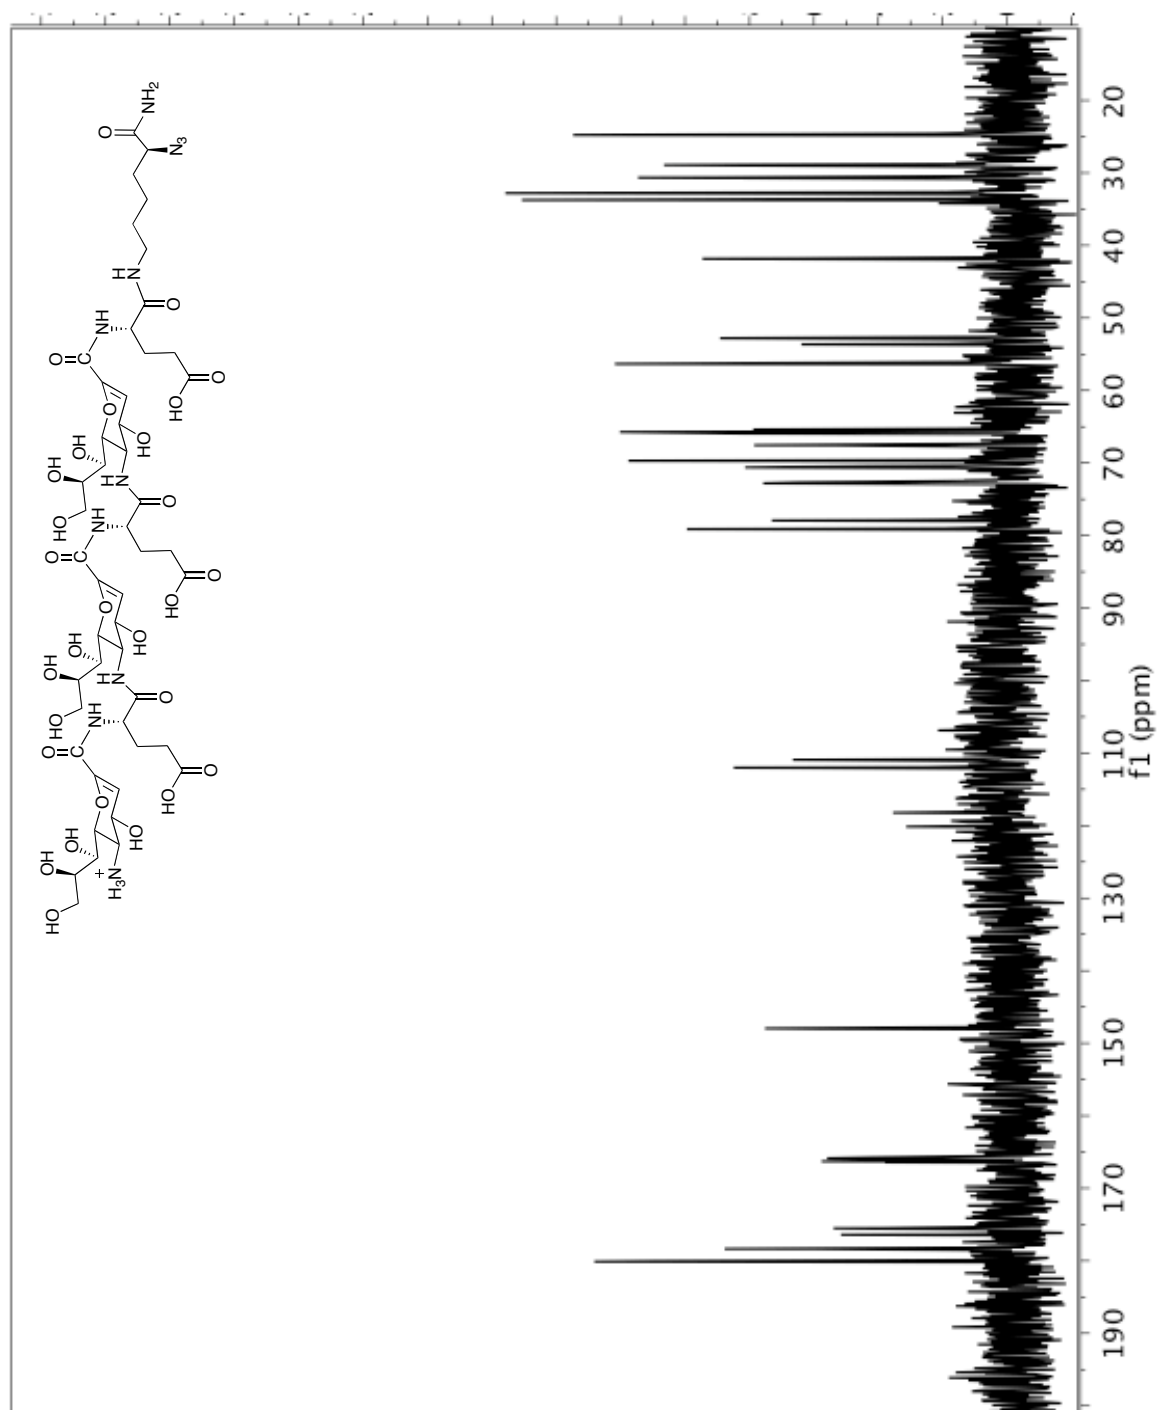

**Figure S17.**  $^{13}\text{C}$  NMR spectrum of  $\alpha/\delta$ -hybrid peptide 12.

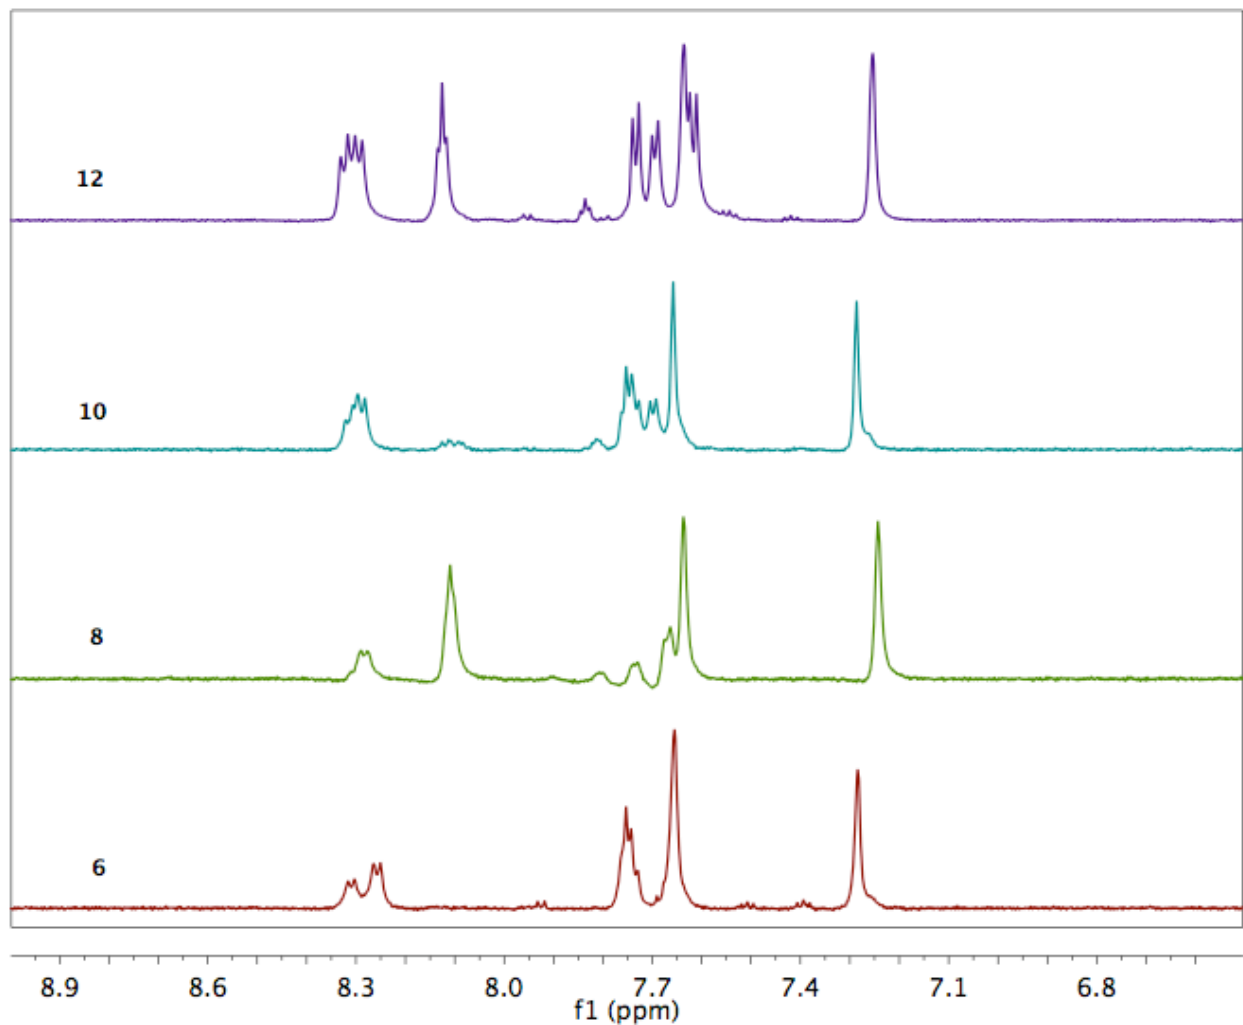

**Figure S18.** Stack plot of the amide regions from <sup>1</sup>H NMR spectra (DMSO-*d*<sub>6</sub> at 298 K, 600 MHz) showing that the amide H of **12** are more dispersed and distinct from each other compared to **6**, **8**, and **10**.

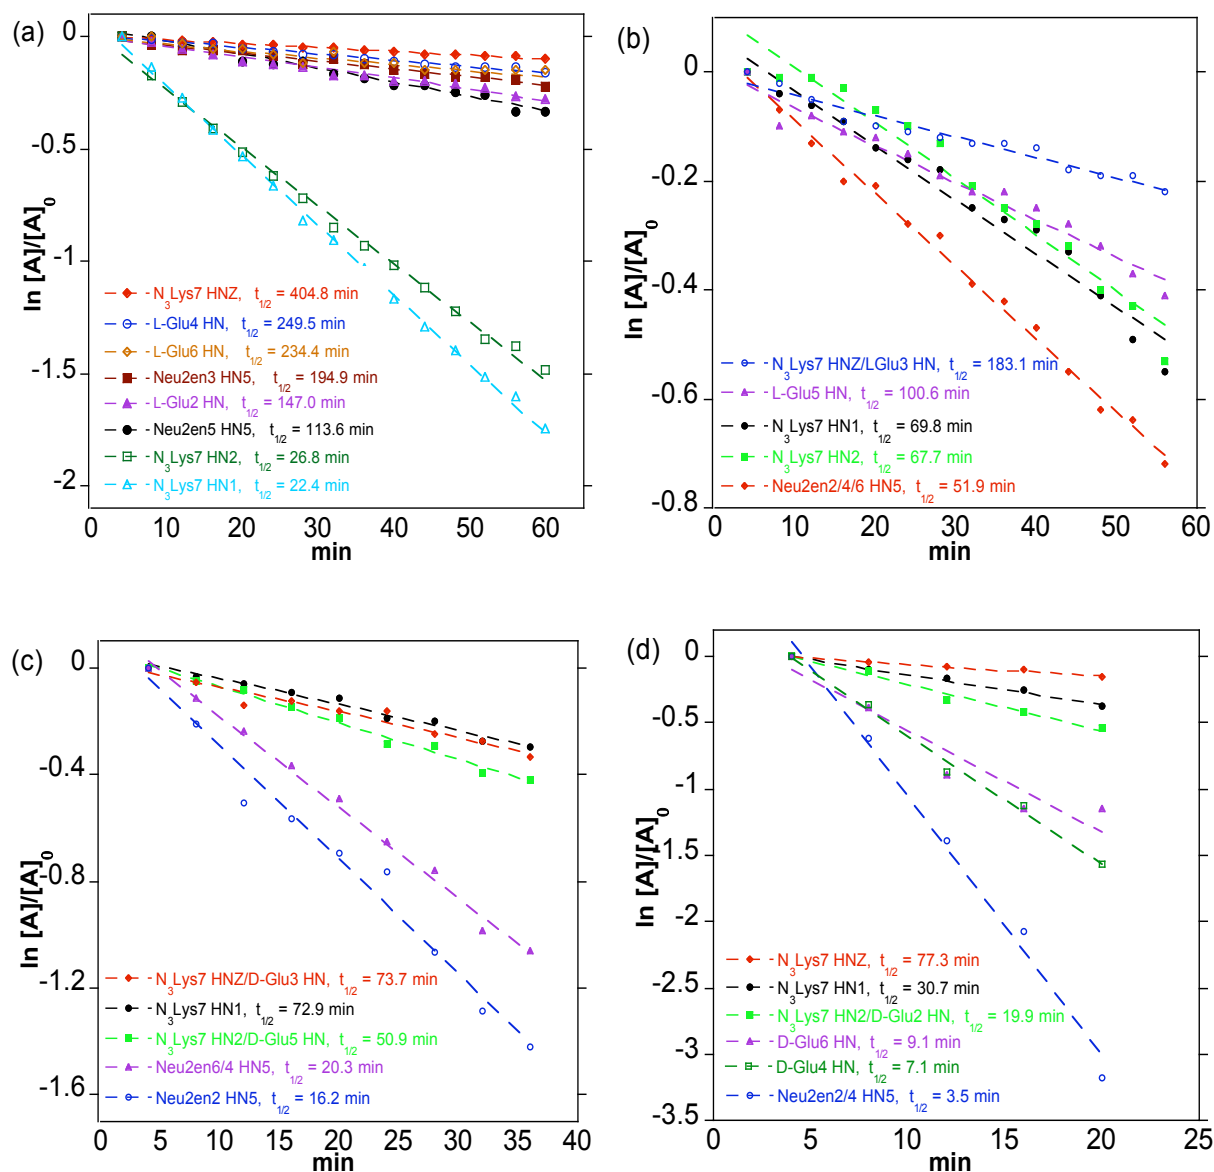

**Figure S19.** NH/ND exchange study for **6**, **8**, **10**, and **12** in DMSO- $d_6$  at 298 K, 600 MHz. Pseudo first order rate plots showing the long  $t_{1/2}$  of H-bonded amide protons of **12** (a) indicating a 2° structure stabilized by intramolecular amide H-bonds. The amide H of **6** (c) and **8** (d) have relatively shorter  $t_{1/2}$  of 3-20 min indicating unfolded peptide chain while those of **10** (b) have  $t_{1/2}$  of 52-100 min that are equivalent to about double the NH/ND exchange rate of **12**.



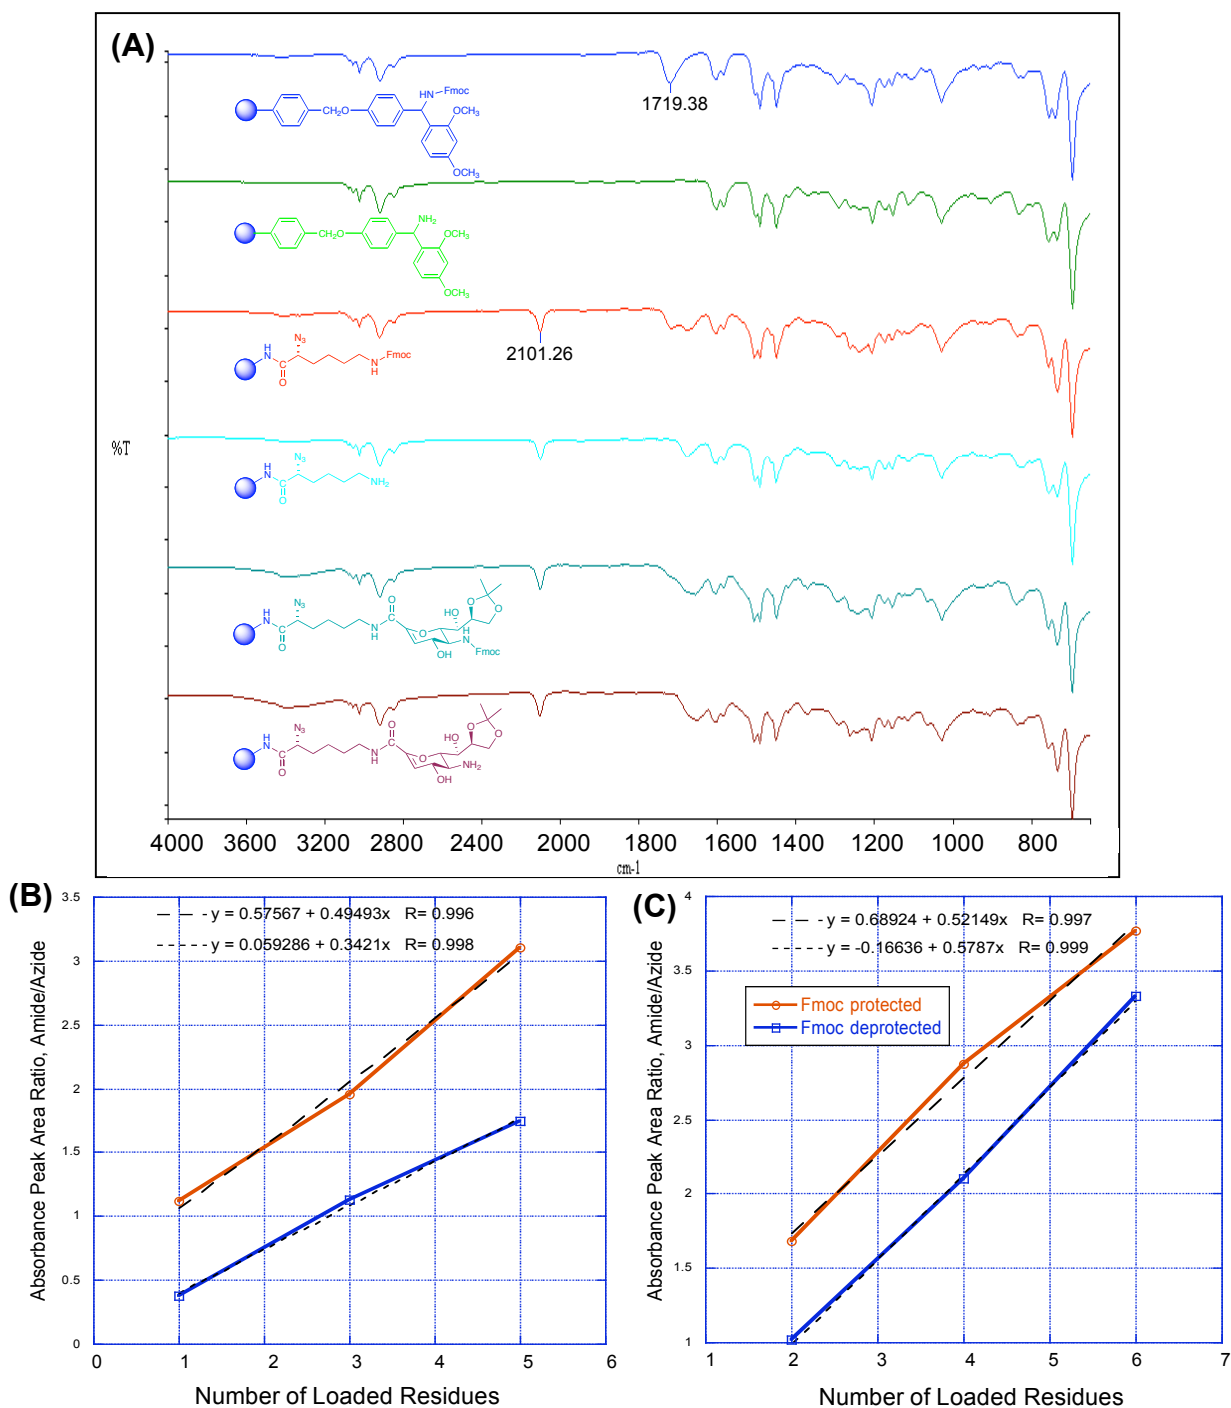

**Figure S20.** (A) Stack plot of IR spectra for on-bead monitoring of SPPS using the synthesis of **8** as an example. Absorption bands at  $1719\text{ cm}^{-1}$  due to C=O of Fmoc,  $2101\text{ cm}^{-1}$  due to  $\text{N}_3$ . (B) and (C) Plots of amide/azide IR band peak area integration showing the linear correlation as a function of peptide length: (B) Odd numbered\* residues, (C) even numbered\* residues. red plot: oligomer with Fmoc protected *N*-terminus; blue plot: oligomer with deprotected *N*-terminus. \**N.B.* Number system is based on the growing peptide chain bound to  $\text{N}_3\text{Lys}$  on the bead, *i.e.* Glu6 is loaded residue number 1.

**Assignment strategy for the NMR chemical shifts of 11 and 12.** NMR characterization of **12** proved to be challenging because of very close and overlapping peaks in its  $^1\text{H}$  NMR spectra. Our previous report on amide-linked Neu2en polymers<sup>1</sup> made it possible to distinguish between the downfield H3 proton of *N*-terminal from internal Neu2en residue. This distinction proved to be crucial in our strategy for **12**. We began the characterization with H $\epsilon$  ( $\delta$  3.22-3.31) of N<sub>3</sub>Lys-7 of **11** because it is an unambiguous aminomethylene, and walked through the residue to completely assign the protons using homonuclear COSY. Next, we used Neu2en H3 as a reporter atom that distinguished Neu2en-1 ( $\delta$  5.96) from Neu2en-3 ( $\delta$  5.91). Assignment of proton resonances was accomplished by separately walking through intraresidue connectivities of terminal and internal Neu2en residues using homonuclear COSY, while one-bond C $\rightarrow$ H connectivities were accomplished using HSQC. Another approach was used to connect the amino acid residues and differentiate the two L-Glu residues since their H $\alpha$ 's have different chemical shifts: L-Glu-2 (H $\alpha$ ,  $\delta$  4.52) and L-Glu-4 (H $\alpha$ ,  $\delta$  4.44). L-Glu-4 H $\alpha$  was assigned using HMBC since we found strong correlations that allowed us to unambiguously identify L-Glu-4: L-Glu-4 C=O $\rightarrow$ H $\alpha$  of L-Glu-4 and L-Glu-4 C=O $\rightarrow$ H $\epsilon$  of N<sub>3</sub>Lys. By deduction, we assigned the other H $\alpha$  to L-Glu-2. Following the same approach that we used for **11**, we assigned the proton resonances of **12** using Neu2en H3 as reporter atom. Neu2en-1 has a unique set of  $^1\text{H}$  NMR resonance peaks. Overlapping peaks were found for H4, H6, H7, H9, and H9' of Neu2en-3 and -5 and these resonances were assigned to both, while their H5 and H8 were very distinct. Neu2en-5 and L-Glu-6 were identified using the following HMBC correlations: L-Glu-6 C=O $\rightarrow$ H $\epsilon$  of N<sub>3</sub>Lys, L-Glu-6 C=O $\rightarrow$ H $\alpha$  of L-Glu-6 and Neu2en-5 C=O $\rightarrow$ H $\alpha$  of L-Glu-6. We also found another HMBC correlations for the following: Neu2en-3 C=O $\rightarrow$ H $\alpha$  of L-Glu-4 and Neu2en-1 C=O $\rightarrow$ H $\alpha$  of L-Glu-2. Furthermore, H $\beta$  and H $\gamma$  of all L-Glu residues are overlapped for both **11** and **12** and we were not able to differentiate them, so all L-Glu H $\beta$  and H $\gamma$  were assigned the same chemical shifts. The table for **11** and **12** below summarizes our approach, which is the same strategy that we applied for **7**, **8**, **9**, and **10**.

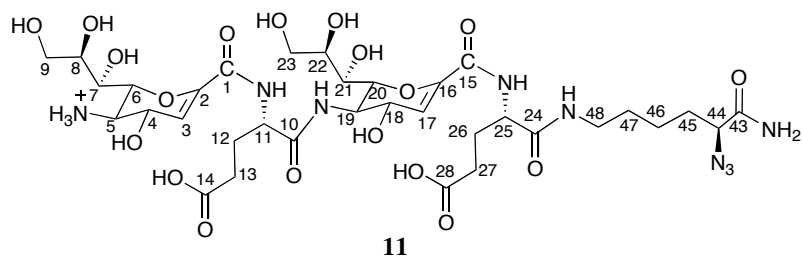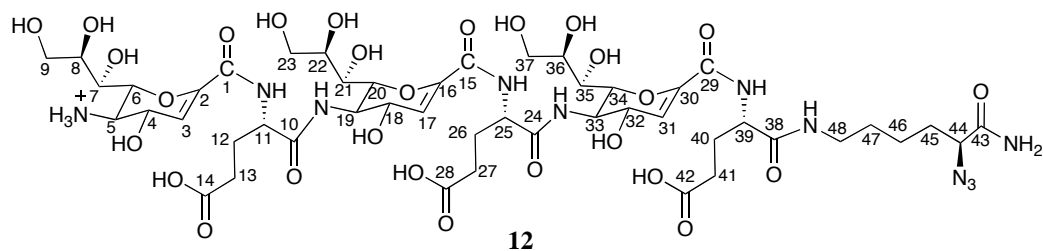

| #        | 11, H-H COSY <sup>a</sup> | 11, HMBC <sup>a,b</sup> | 12, H-H COSY <sup>a</sup> | 12, HMBC <sup>a,b</sup> |
|----------|---------------------------|-------------------------|---------------------------|-------------------------|
| Neu2en-1 |                           |                         |                           |                         |
| 1        | -                         | 3                       | -                         | 3, 11                   |
| 2        | -                         | 3                       | -                         | 3, 4                    |
| 3        | 4                         | 4                       | 4                         | 4                       |
| 4        | 3, 5                      | 5, 6                    | 3, 5                      | 5, 6                    |
| 5        | 4, 6                      | 3, 4                    | 4, 6                      | 4, 6                    |
| 6        | 5, 7                      | 5, 7                    | 5, 7                      | 5, 7                    |
| 7        | 6, 8                      | -                       | 6, 8                      | -                       |
| 8        | 7, 9, 9'                  | 7                       | 7, 9, 9'                  | -                       |
| 9        | 8, 9'                     | -                       | 8, 9'                     | -                       |
| 9'       | 8, 9                      | -                       | 8, 9                      | -                       |
| L-Glu-2  |                           |                         |                           |                         |
| 10       | -                         | 11, 19                  | -                         | 11, 12                  |
| 11       | 12                        | 12, 13                  | 12                        | 12, 13                  |
| 12       | 11, 13                    | 11, 13                  | 11, 13                    | 11, 13                  |
| 13       | 12                        | 11, 12                  | 12                        | 11, 12                  |
| 14       | -                         | 13                      | -                         | 13                      |
| Neu2en-3 |                           |                         |                           |                         |
| 15       | -                         | 17                      | -                         | 17, 25                  |
| 16       | -                         | 17                      | -                         | 17, 18                  |
| 17       | 18                        | 18                      | 18                        | 18                      |
| 18       | 17, 19                    | 19                      | 17, 19                    | 19, 20                  |
| 19       | 18, 20                    | 17, 18, 20              | 18, 20                    | 17, 18, 20              |
| 20       | 19, 21                    | 19                      | 19, 21                    | 19                      |
| 21       | 20, 22                    | -                       | 20, 22                    | 19, 20                  |
| 22       | 21, 23, 23'               | 21, 23                  | 21, 23, 23'               | 21, 23, 23'             |
| 23       | 22, 23'                   | -                       | 22, 23'                   | 21                      |
| 23'      | 22, 23                    | -                       | 22, 23                    | -                       |

|                          |     |        |            |             |            |
|--------------------------|-----|--------|------------|-------------|------------|
| L-Glu-4                  | 24  | -      | 25, 48     | -           | 25, 26     |
|                          | 25  | 26     | 26, 27     | 26          | 26, 27     |
|                          | 26  | 25, 27 | 25, 27     | 25, 27      | 25, 27     |
|                          | 27  | 26     | 25, 26     | 26          | 25, 26     |
|                          | 28  | -      | 27         | -           | 26, 27     |
| Neu2en-5                 | 29  | -      | -          | -           | 31, 39     |
|                          | 30  | -      | -          | -           | 31         |
|                          | 31  | -      | -          | 32          | 32         |
|                          | 32  | -      | -          | 31, 33      | 33, 34     |
|                          | 33  | -      | -          | 32, 34      | 31, 32, 34 |
|                          | 34  | -      | -          | 33, 35      | 33         |
|                          | 35  | -      | -          | 34, 36      | 33, 34     |
|                          | 36  | -      | -          | 35, 37, 37' | 35, 37     |
|                          | 37  | -      | -          | 36, 37'     | 35         |
|                          | 37' | -      | -          | 36, 37      |            |
| L-Glu-6                  | 38  | -      | -          | -           | 39, 40, 48 |
|                          | 39  | -      | -          | 40          | 40, 41     |
|                          | 40  | -      | -          | 39, 41      | 39, 41     |
|                          | 41  | -      | -          | 40          | 39,40      |
|                          | 42  | -      | -          | -           | 40, 41     |
| N <sub>3</sub> Lys-5 (7) | 43  | -      | 44         | -           | 44, 45     |
|                          | 44  | 45     | 45, 46     | 45          | 45, 46     |
|                          | 45  | 44, 46 | 44, 46     | 44, 46      | 44, 46     |
|                          | 46  | 45, 47 | 44, 45, 48 | 45, 47      | 45, 47     |
|                          | 47  | 46, 48 | 45, 46, 48 | 46, 48      | 45, 46, 48 |
|                          | 48  | 47     | 46, 47     | 47          | 46, 47     |

<sup>a</sup>D<sub>2</sub>O, 600 MHz

<sup>b</sup>HMBC correlations are from carbon atom #(s) in column 1 to the indicated proton; *J*<sub>C,H</sub> at 8 Hz.

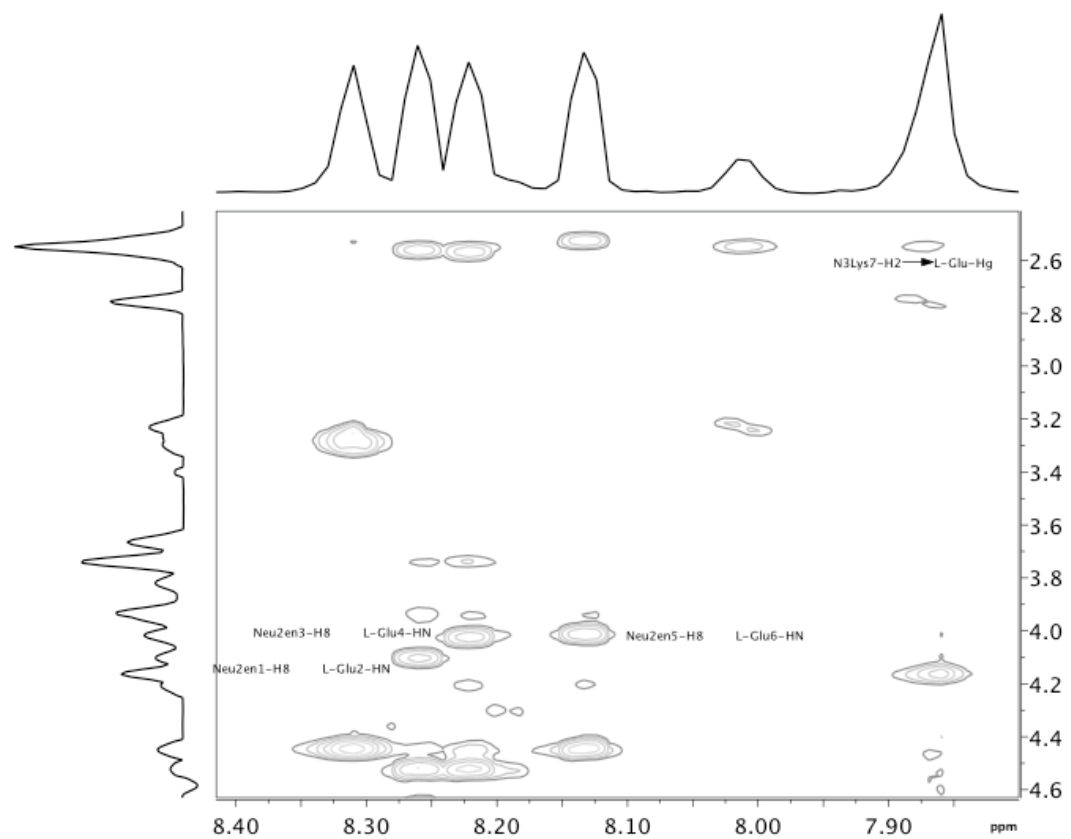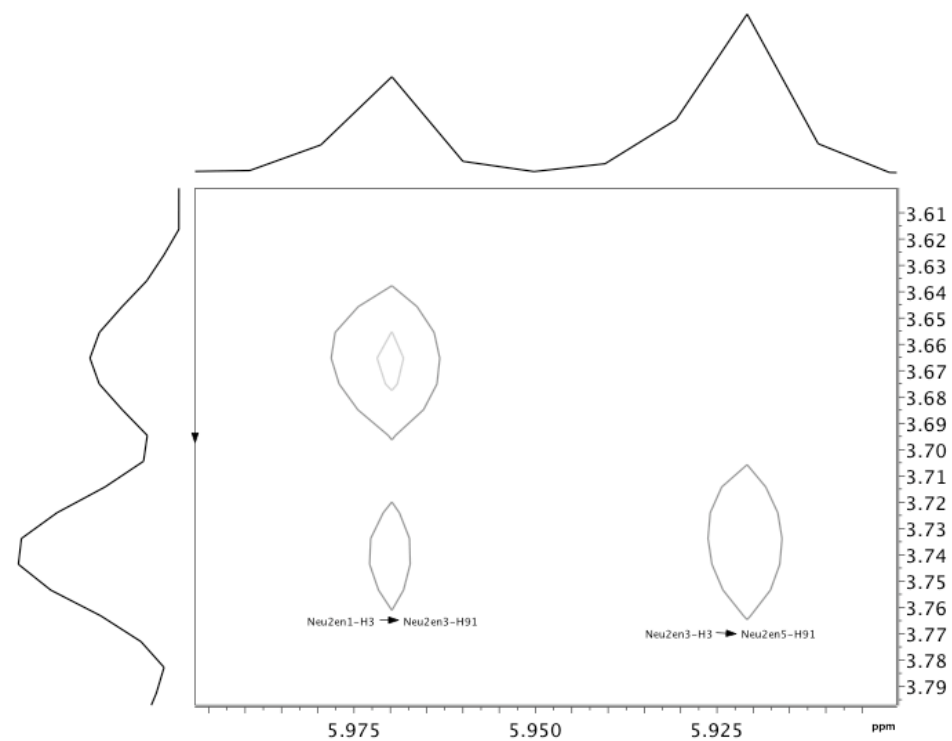

**Figure S21.** Prominent long range ROE's for **12**.

**Figure S22.** The effect of solvent and solvent screening of electrostatic charges in the X-PLOR structure calculation was implemented using the 1/R dielectric option for the electrostatic energy function in XPLOR by setting the dielectric constant equal to  $\epsilon_0 R$ . The electrostatic energy function ( $f_{ELEC}(R)$ ) is given by:

$$f_{ELEC}(R) = Q_i Q_j \frac{C}{\epsilon_0 R^2} SW(R, R_{on}, R_{off})$$

where  $SW(R, R_{on}, R_{off}) = 0$  or  $1$  if  $R > R_{off}$  (7.5 Å) or  $R < R_{on}$  (6.5 Å) respectively, and

$$SW(R, R_{on}, R_{off}) = \frac{(R^2 - R_{off}^2) (R^2 - R_{off}^2 + 3(R^2 - R_{on}^2))}{R_{off}^2 - R_{on}^2} \quad \text{if } R_{off} > R > R_{on}.$$

**Table 1.** Strong (s)<sup>a</sup>, medium (m)<sup>a</sup> and weak (w)<sup>a</sup> ROEs observed in the 500 ms ROESY spectrum of **10** in 9:1 H<sub>2</sub>O/D<sub>2</sub>O at 600 MHz, 298 K.

| Atom | Residue | Atom | Residue        | ROE | Atom | Residue | Atom | Residue        | ROE |
|------|---------|------|----------------|-----|------|---------|------|----------------|-----|
| α    | 1       | γ    | 1              | w   | NH   | 4       | 5    | 4              | w   |
| α    | 1       | β    | 1              | w   | NH   | 4       | 6    | 4              | s   |
| γ    | 1       | β    | 1              | w   | NH   | 4       | 9    | 4              | w   |
| 3    | 2       | 4    | 2              | m   | α    | 5       | γ    | 5              | w   |
| 3    | 2       | α    | 3              | w   | γ    | 5       | β    | 5              | w   |
| 3    | 2       | 5    | 2              | w   | NH   | 5       | α    | 3              | w   |
| 4    | 2       | 5    | 2              | w   | NH   | 5       | α    | 5              | w   |
| 5    | 2       | 7    | 2              | w   | NH   | 5       | β    | 5              | w   |
| 6    | 2       | β    | 1              | w   | NH   | 5       | γ    | 5              | w   |
| 6    | 2       | 9    | 4              | w   | NH   | 5       | 6    | 4 <sup>b</sup> | w   |
| 8    | 2       | 9    | 2              | s   | NH   | 5       | 7    | 4              | w   |
| 9'   | 2       | 7    | 2              | s   | NH   | 5       | 9    | 4              | w   |
| NH   | 2       | α    | 1 <sup>b</sup> | s   | 3    | 6       | α    | 7              | w   |
| NH   | 2       | α    | 3              | w   | 3    | 6       | 4    | 6              | m   |
| NH   | 2       | β    | 1              | w   | 3    | 6       | 5    | 6              | w   |
| NH   | 2       | 4    | 2              | w   | 5    | 6       | 9    | 6              | w   |
| NH   | 2       | 5    | 2              | w   | 5    | 6       | 9'   | 6              | w   |
| NH   | 2       | 6    | 4              | w   | 6    | 6       | 6    | 9              | w   |
| NH   | 2       | 9    | 2              | w   | 8    | 6       | 9    | 6              | s   |
| α    | 3       | γ    | 3              | w   | NH   | 6       | α    | 5 <sup>b</sup> | s   |
| α    | 3       | 9'   | 4              | w   | NH   | 6       | 4    | 6              | m   |
| γ    | 3       | β    | 3              | w   | NH   | 6       | 5    | 6              | w   |
| NH   | 3       | α    | 3              | w   | NH   | 6       | 6    | 6              | s   |
| NH   | 3       | β    | 3              | w   | α    | 7       | γ    | 7              | w   |
| NH   | 3       | γ    | 3              | w   | α    | 7       | 8    | 6              | w   |
| NH   | 3       | 3    | 4              | w   | α    | 7       | 9'   | 6              | w   |
| NH   | 3       | 6    | 2 <sup>b</sup> | w   | β    | 7       | α    | 7              | w   |
| NH   | 3       | 7    | 2              | w   | β    | 7       | δ    | 7              | w   |
| NH   | 3       | 8    | 2              | w   | δ    | 7       | 5    | 6              | w   |
| NH   | 3       | 9'   | 2              | w   | ε    | 7       | δ    | 7              | w   |
| 3    | 4       | 4    | 4              | m   | ε    | 7       | γ    | 7              | w   |
| 3    | 4       | 5    | 4              | w   | NH   | 7       | α    | 7              | w   |
| 3    | 4       | 9    | 6              | w   | NH   | 7       | δ    | 7              | w   |
| 3    | 4       | 9'   | 6              | w   | NH   | 7       | γ    | 7              | w   |
| 4    | 4       | 6    | 4              | w   | NH   | 7       | ε    | 7              | w   |
| 6    | 4       | 9    | 4              | w   | NH   | 7       | 3    | 6              | w   |
| 8    | 4       | α    | 3              | w   | NH   | 7       | 6    | 6              | w   |
| 8    | 4       | 9    | 4              | w   | NH   | 7       | 7    | 6              | w   |
| 9b   | 4       | 7    | 4              | s   | NH   | 7       | 8    | 6              | w   |
| NH   | 4       | α    | 3 <sup>b</sup> | s   | NH   | 7       | 9    | 6              | w   |
| NH   | 4       | 4    | 4              | m   | NH   | 7       | 9'   | 6              | w   |

<sup>a</sup>Distance were categorized s (2.9 Å), m (3.3 Å), and w (5.0 Å) as upper bond distance limits.

<sup>b</sup>Interresidue ROE assignment consistent with calculations but ambiguous due to overlap.

**Table 2.** Strong (s)<sup>a</sup>, medium (m)<sup>a</sup> and weak (w)<sup>a</sup> ROEs observed in the 500 ms ROESY spectrum of **12** in 9:1 H<sub>2</sub>O/D<sub>2</sub>O at 600 MHz, 298 K.

| Atom | Residue | Atom | Residue        | ROE | Atom            | Residue | Atom | Residue        | ROE |
|------|---------|------|----------------|-----|-----------------|---------|------|----------------|-----|
| 3    | 1       | 4    | 1              | s   | NH              | 4       | γ    | 4              | w   |
| 3    | 1       | 5    | 1              | w   | NH              | 4       | 3    | 3              | w   |
| 3    | 1       | 9    | 3 <sup>b</sup> | w   | NH              | 4       | 5    | 3              | w   |
| 4    | 1       | 5    | 1              | w   | NH              | 4       | 6    | 3              | w   |
| 6    | 1       | 8    | 1              | w   | NH              | 4       | 8    | 3              | w   |
| 8    | 1       | 9    | 1              | w   | NH              | 4       | 9    | 5              | w   |
| 9a   | 1       | 9'   | 1              | m   | NH              | 4       | 9'   | 5              | w   |
| 9b   | 1       | 7    | 3              | m   | 3               | 5       | α    | 6              | w   |
| α    | 2       | γ    | 2              | w   | 3               | 5       | 4    | 5              | s   |
| α    | 2       | β    | 2              | w   | 3               | 5       | 5    | 5              | w   |
| NH   | 2       | β    | 2              | w   | 4               | 5       | 6    | 5              | w   |
| NH   | 2       | γ    | 2              | w   | 5               | 5       | 7    | 5              | w   |
| NH   | 2       | 3    | 1              | w   | 6               | 5       | 7    | 5              | w   |
| NH   | 2       | 6    | 1              | w   | 7               | 5       | 9'   | 5              | s   |
| NH   | 2       | 6    | 3              | w   | 8               | 5       | 7    | 5              | w   |
| NH   | 2       | 8    | 1              | w   | NH              | 5       | α    | 4 <sup>b</sup> | s   |
| NH   | 2       | 9    | 3              | w   | NH              | 5       | β    | 6 <sup>b</sup> | w   |
| NH   | 2       | 9'   | 3              | w   | NH              | 5       | 4    | 5              | m   |
| 3    | 3       | 4    | 3              | s   | NH              | 5       | 6    | 5              | w   |
| 3    | 3       | 5    | 3              | w   | NH              | 5       | 7    | 5              | w   |
| 3    | 3       | 5    | 5              | w   | α               | 6       | β    | 6              | w   |
| 3    | 3       | 6    | 5              | w   | α               | 6       | γ    | 6              | w   |
| 3    | 3       | 9    | 5 <sup>b</sup> | w   | NH              | 6       | β    | 6              | w   |
| 4    | 3       | 6    | 3              | w   | NH              | 6       | γ    | 6              | w   |
| 6    | 3       | 7    | 5              | w   | NH              | 6       | 3    | 5              | w   |
| 6    | 3       | 8    | 3              | w   | NH              | 6       | 5    | 5              | w   |
| 7    | 3       | 9'   | 3              | s   | NH              | 6       | 6    | 5              | w   |
| NH   | 3       | α    | 2 <sup>b</sup> | s   | NH              | 6       | 8    | 5              | w   |
| NH   | 3       | β    | 4 <sup>b</sup> | w   | α               | 7       | β    | 7              | w   |
| NH   | 3       | 4    | 3              | m   | α               | 7       | γ    | 7              | w   |
| NH   | 3       | 6    | 3              | w   | α               | 7       | δ    | 7              | w   |
| NH   | 3       | 7    | 3              | w   | β               | 7       | γ    | 7              | w   |
| NH   | 3       | 9    | 5              | w   | γ               | 7       | δ    | 7              | w   |
| α    | 4       | β    | 4              | w   | NH              | 7       | α    | 6              | w   |
| α    | 4       | γ    | 4              | w   | NH              | 7       | ε    | 7              | w   |
| NH   | 4       | α    | 2              | w   | NH              | 7       | NH   | 6              | w   |
| NH   | 4       | α    | 4              | w   | NH <sub>2</sub> | 7       | α    | 7              | w   |
| NH   | 4       | β    | 4              | w   | NH <sub>2</sub> | 7       | γ    | 4              | w   |

<sup>a</sup>Distance were categorized s (2.9 Å), m (3.3 Å), and w (5.0 Å) as upper bond distance limits.

<sup>b</sup>Interresidue ROE assignment consistent with calculations but ambiguous due to overlap.



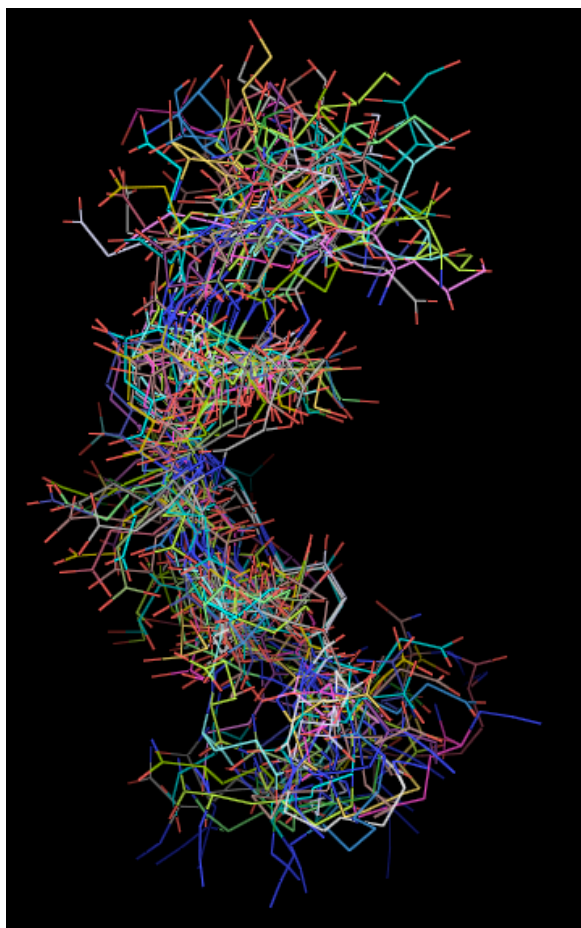

**Figure S23.** Overlay of 25 low energy structures of **8** showing non-convergence to a single-preferred structure; all H have been omitted for clarity (backbone atom rmsd:  $2.080 \pm 0.750$ ; non-hydrogen atom rmsd:  $3.325 \pm 1.013$ ).

Sample Name : Cpd 6  
Solvent Name : D2O  
Concentration : 0.36  
Unit : mM

Function : Absorbance  
Wavelength Range : 194 to 600 nm  
Integration Time : 5.0 s

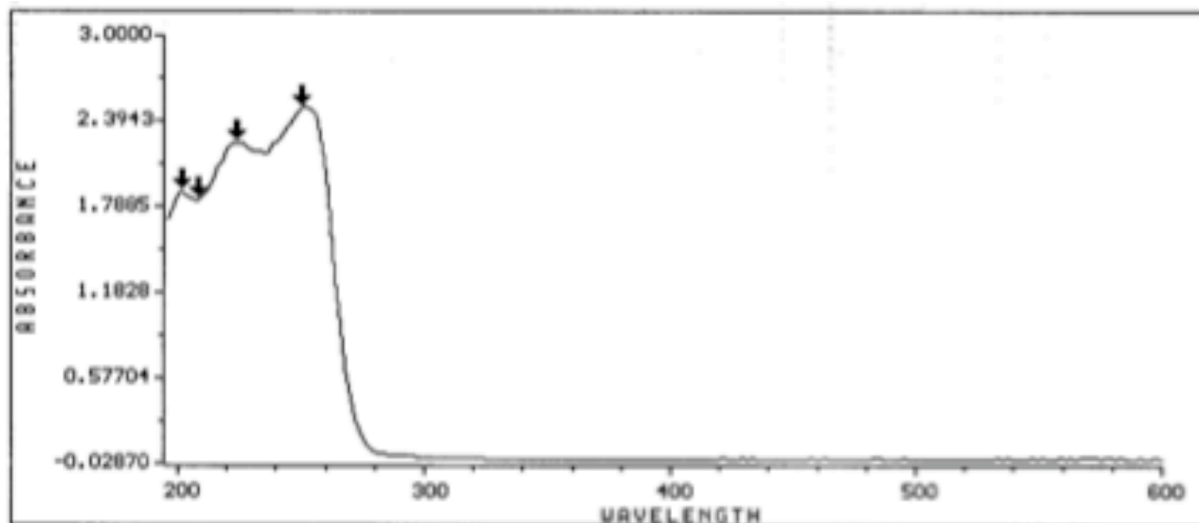

Figure S24. UV spectrum of 6 in D<sub>2</sub>O.

Sample Name : Cpd 8  
Solvent Name : D2O  
Concentration : 0.36  
Unit : mM

Function : Absorbance  
Wavelength Range : 194 to 600 nm  
Integration Time : 5.0 s

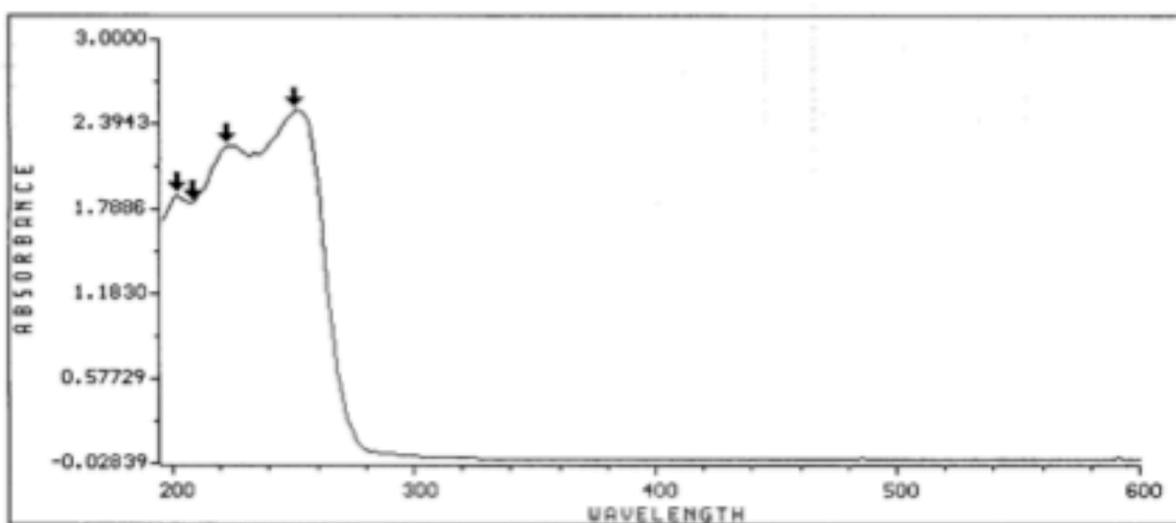

Figure S25. UV spectrum of 8 in D<sub>2</sub>O.

Sample Name : Cpd **10**  
Solvent Name : D2O  
Concentration : 0.36  
Unit : mM

Function : Absorbance  
Wavelength Range : 194 to 600 nm  
Integration Time : 5.0 s

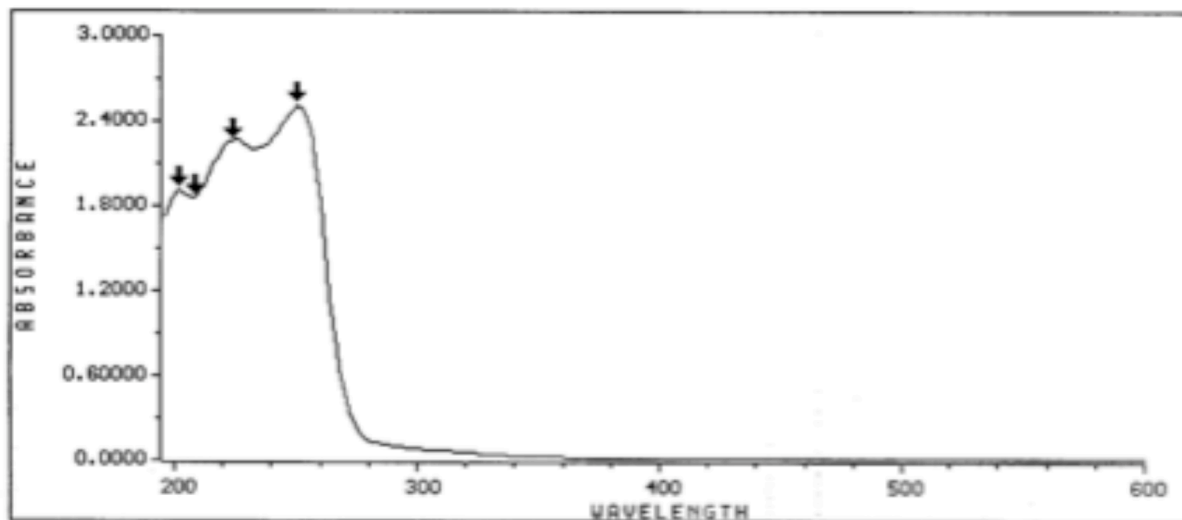

Figure S26. UV spectrum of **10** in D<sub>2</sub>O.

Sample Name : Cpd **12**  
Solvent Name : D2O  
Concentration : 0.36  
Unit : mM

Function : Absorbance  
Wavelength Range : 194 to 600 nm  
Integration Time : 5.0 s

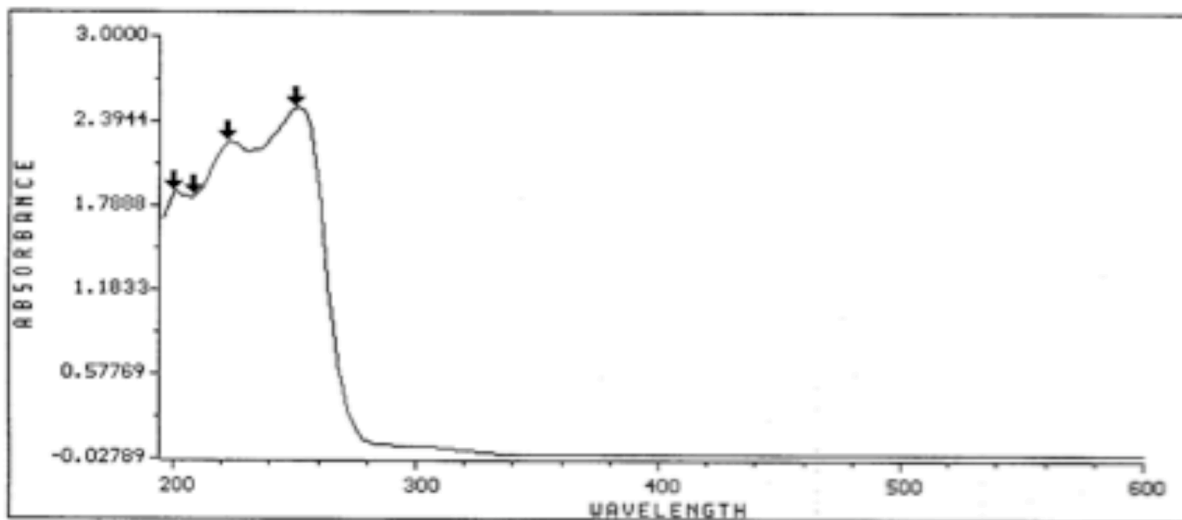

Figure S27. UV spectrum of **12** in D<sub>2</sub>O.

References:

- (1) Gregar, T. Q.; Gervay-Hague, J. *J. Org. Chem.* **2004**, *69*, 1001-1009.
- (2) Nyffeler, P. T.; Liang, C.-H.; Koeller, K. M.; Wong, C.-H. *J. Am. Chem. Soc.* **2002**, *124*, 10773-10778.
- (3) Lundquist, J. T.; Pelletier, J. C. *Org. Lett.* **2001**, *3*, 781-783.
